# Supplementary material for: Synthesis of 1,2,3-Triazole-Containing Methoxylated Cinnamides and Their Antileishmanial Activity against the Leishmania braziliensis Species
Source: MDPI journal article supplement (doi:10.3390/ph16081113), 2023-08-07
Supplement: s1 [file s1]

## SUPPLEMENTARY MATERIAL

# Synthesis and antileishmanial activity against *Leishmania braziliensis* species of 1,2,3-triazole containing methoxylated cinnamides

Fabíola Suelen dos Santos<sup>1</sup>, Rossimiriam Pereira de Freitas<sup>1</sup>, Camila Simões de Freitas<sup>2</sup>, Débora Vasconcelos Costa Mendonça<sup>2</sup>, Daniela Pagliara Lage<sup>2</sup>, Grasielle Vieira de Souza Tavares<sup>2</sup>, Amanda Sanchez Machado<sup>2</sup>, Vivian Tamietti Martins<sup>2</sup>, Adílson Vidal Costa<sup>3</sup>, Vagner Tebaldi Queiroz<sup>3</sup>, Mariana Belizário de Oliveira<sup>3</sup>, Fabrício Marques de Oliveira<sup>4</sup>, Luciana Maria Ribeiro Antinarelli<sup>5</sup>, Elaine Soares Coimbra<sup>5</sup>, Eduardo Jorge Pilau<sup>6</sup>, Geovane Perez da Silva<sup>6</sup>, Eduardo Antonio Ferraz Coelho<sup>2</sup>, and Róbson Ricardo Teixeira<sup>7,\*</sup>

- <sup>1</sup> Laboratório de Síntese Orgânica (LABSINTO), Departamento de Química, Universidade Federal de Minas Gerais, Belo Horizonte, Minas Gerais, Brazil; fabiolasuelen92@hotmail.com (F.S. dos S.); rossipfreitas@gmail.com (R.P.F.)
- <sup>2</sup> Programa de Pós-Graduação em Ciências da Saúde: Infectologia e Medicina Tropical, Faculdade de Medicina, Universidade Federal de Minas Gerais, Belo Horizonte, Minas Gerais, Brazil; camilasimoesf@gmail.com (C.S. de F.); eduardoferrazcoelho@yahoo.com.br (E. A. F. C.); debs.mendonca@gmail.com (D.V.C.M.); danipagliara@hotmail.com (D. P. L.); grasysv@hotmail.com (G.V. de S.T.); manda\_sanchez92@hotmail.com (A. S. M.); viviantamietti@yahoo.com.br (V. T. M.)
- <sup>3</sup> Grupo de Estudo Aplicado em Produtos Naturais e Síntese Orgânica (GEAPS), Departamento de Química e Física, Universidade Federal do Espírito Santo, Alegre, Espírito Santo, Brazil; avcosta@hotmail.com (A. V. C.); vagner.queiroz@ufes.br (V. T. Q); mariana.b.oliveira@edu.ufes.br (M. B. de O.)
- <sup>4</sup> Instituto Federal de Minas Gerais (IFMG), Campus Ouro Branco, Ouro Branco, Ouro Branco, Minas Gerais, Brazil; fabricao.marques@ifmg.edu.br
- <sup>5</sup> Departamento de Parasitologia, Microbiologia e Imunologia, Instituto de Ciências Biológicas, Universidade Federal de Juiz de Fora, Juiz de Fora, Minas Gerais, Brazil; lucianantinarelli@yahoo.com.br (L. M. R. A.); elaine.coimbra@ufjf.edu.br (E. S.C.);
- <sup>6</sup> Departamento de Química, Centro de Ciências Exatas, Universidade Estadual de Maringá, Maringá, Paraná, Brazil; ejpilau@uem.br (E. J. P.); geovane.perez13@gmail.com (G. P. da S.)
- <sup>7</sup> Grupo de Síntese e Pesquisa de Compostos Bioativos (GSPCB), Departamento de Química, Universidade Federal de Viçosa, 36570-900, Viçosa, Minas Gerais, Brazil.
- \* Correspondence: robsonr.teixeira@ufv.br

For the presentation of the spectra, the following abbreviations were utilized:

IR.....Infrared

ATR.....Attenuated total reflectance

$^1\text{H}$  NMR.....Hydrogen-1 nuclear magnetic resonance

$^{13}\text{C}$  NMR.....Carbon-13 nuclear magnetic resonance

HRMS.....High resolution mass spectrometry

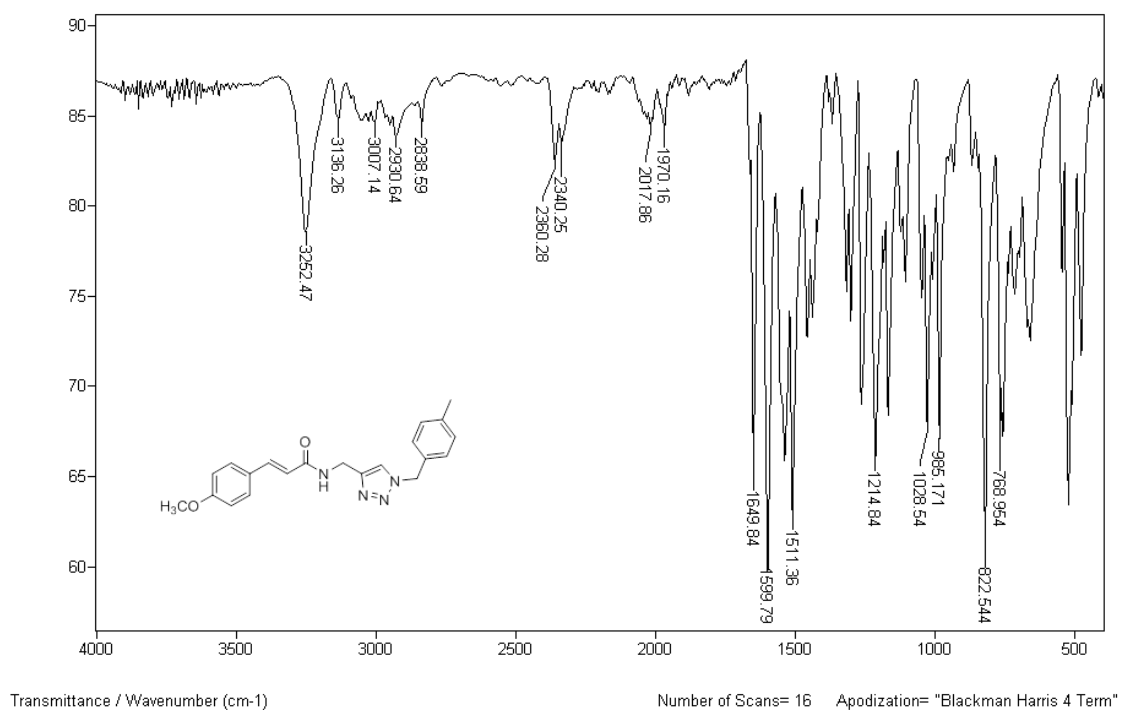

**Figure S1** - IR spectrum (ATR) of **5**.

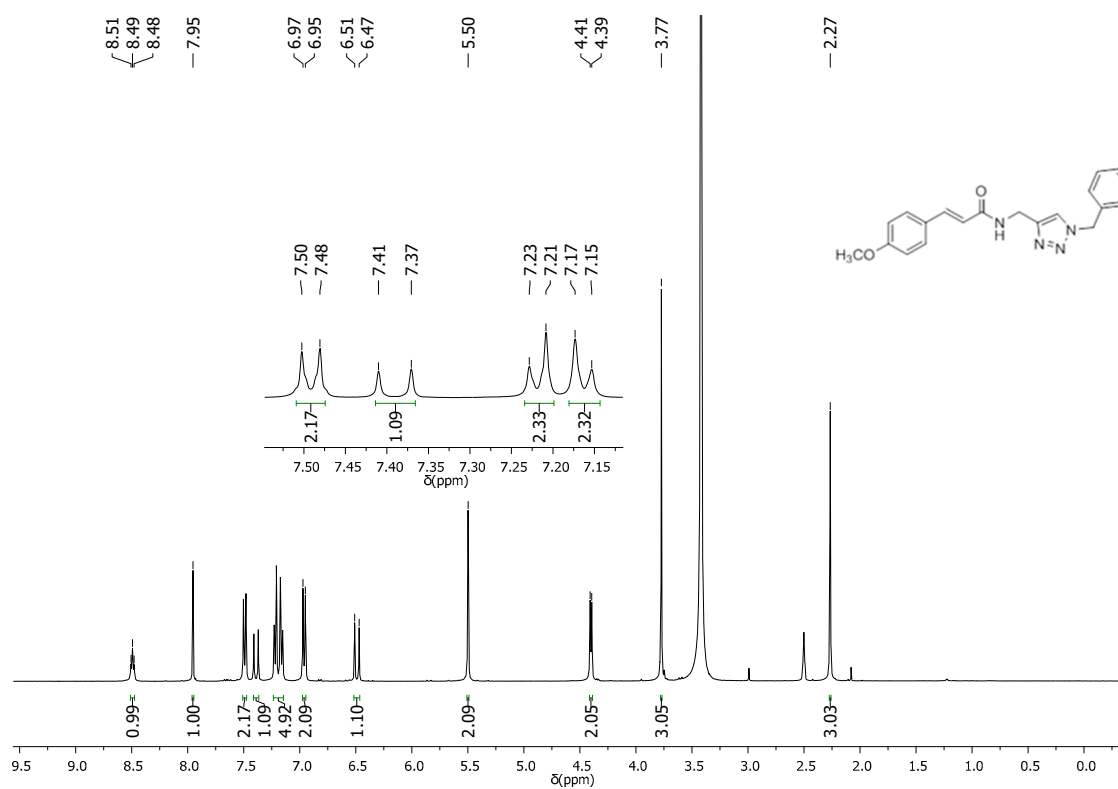

**Figure S2** - <sup>1</sup>H NMR spectrum (400 MHz, DMSO-*d*<sub>6</sub>) of **5**.

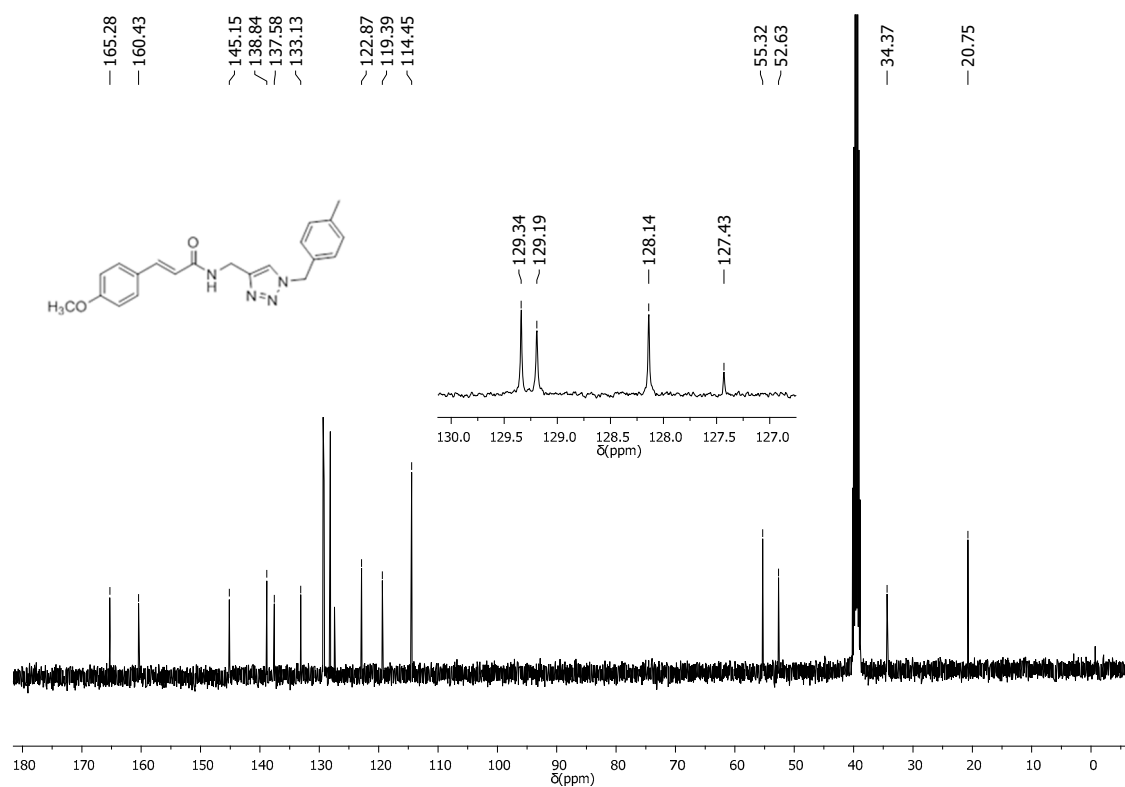

**Figure S3** - <sup>13</sup>C NMR spectrum (100 MHz, DMSO-*d*<sub>6</sub>) of **5**.

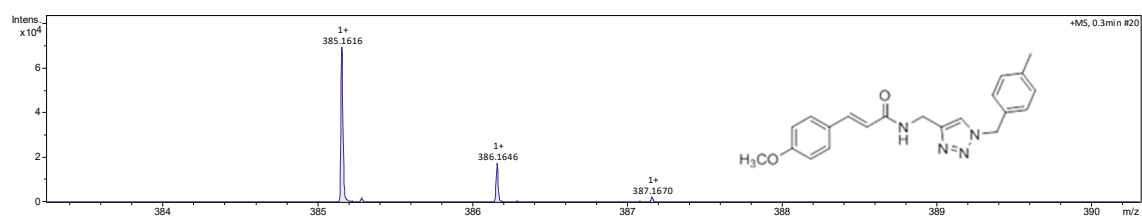

**Figure S4** - HRMS spectrum of **5**.

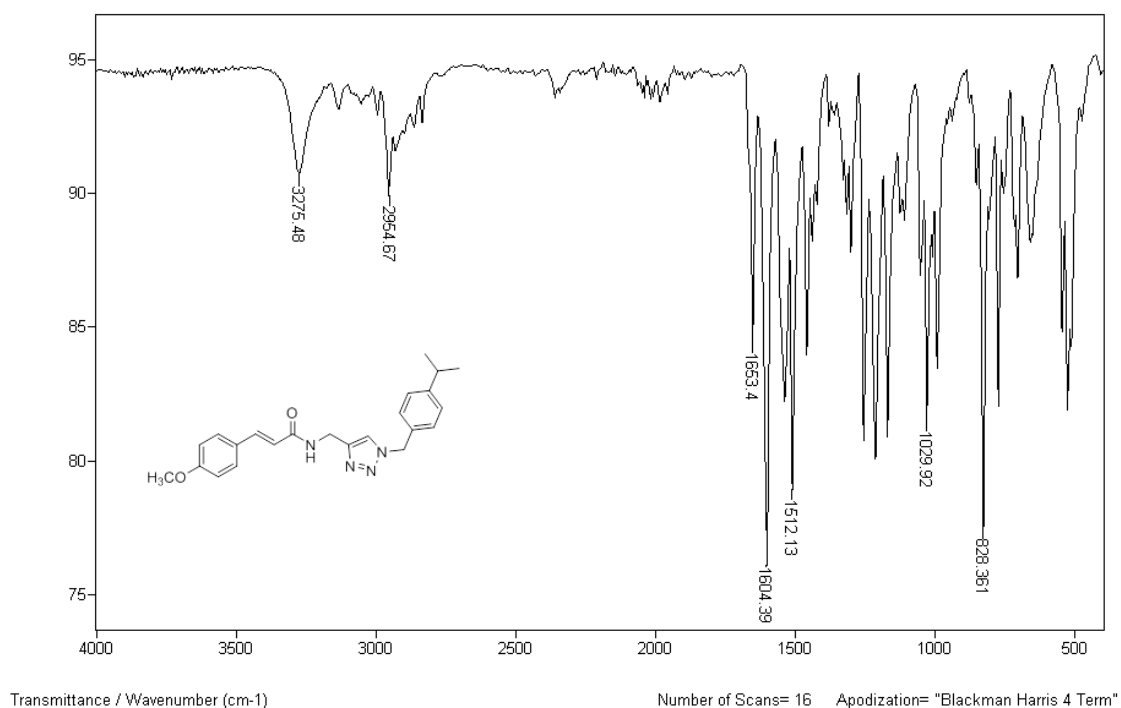

**Figure S5** - IR spectrum (ATR) of **6**.

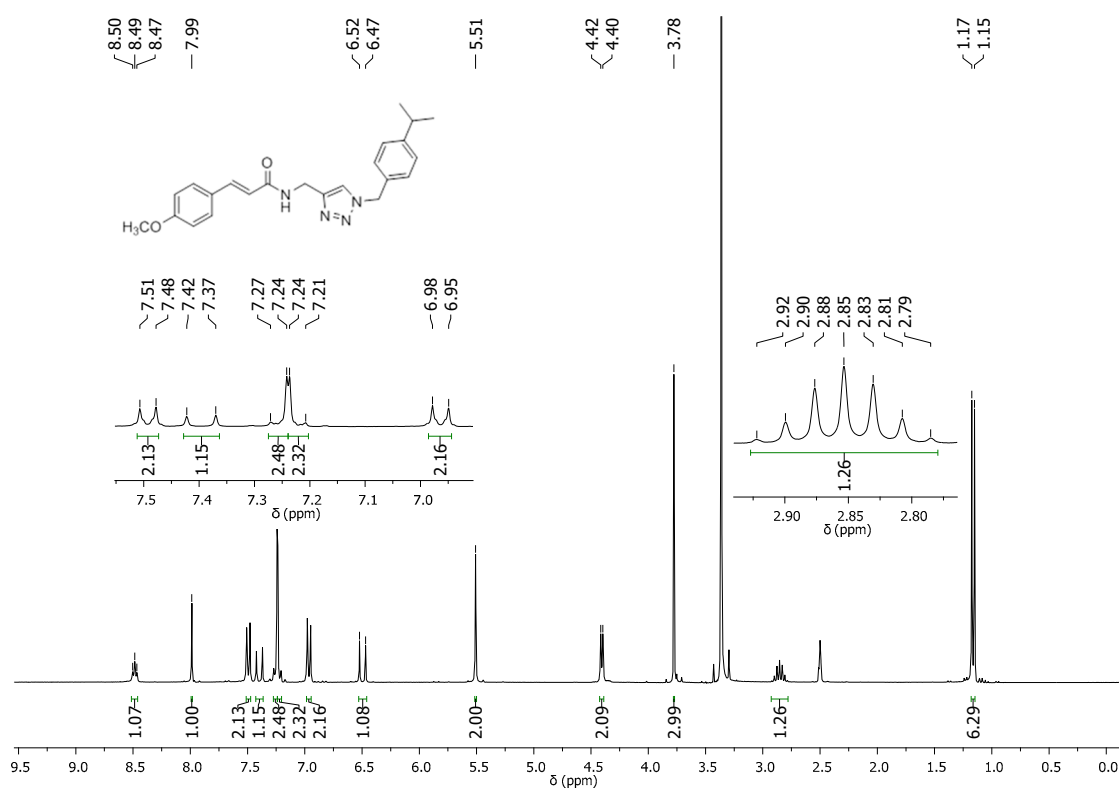

**Figure S6** - <sup>1</sup>H NMR spectrum (400 MHz, DMSO-*d*<sub>6</sub>) of **6**.

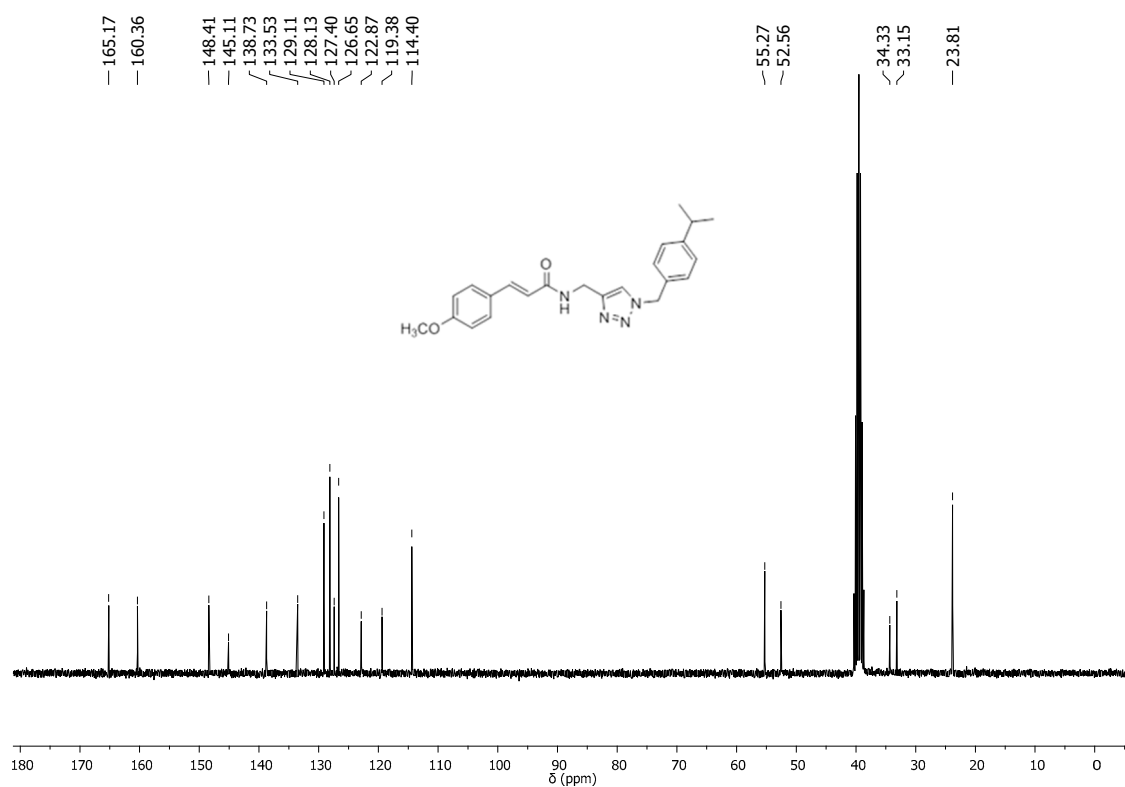

**Figure S7** - <sup>13</sup>C NMR spectrum (100 MHz, DMSO-*d*<sub>6</sub>) of **6**.

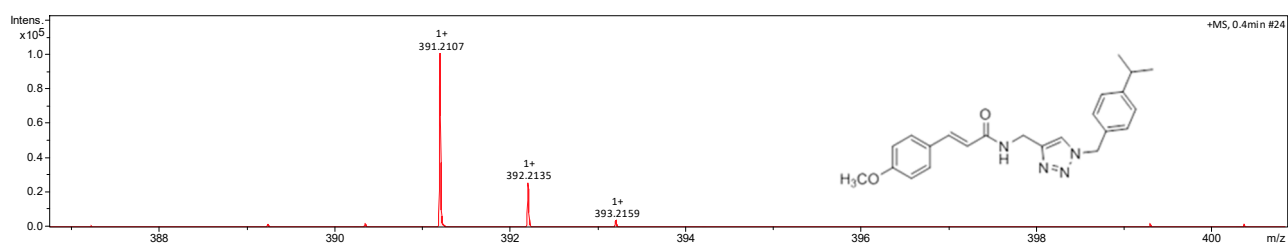

**Figure S8** - HRMS spectrum of **6**.

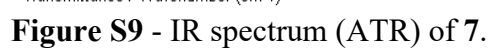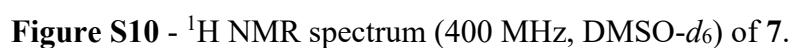

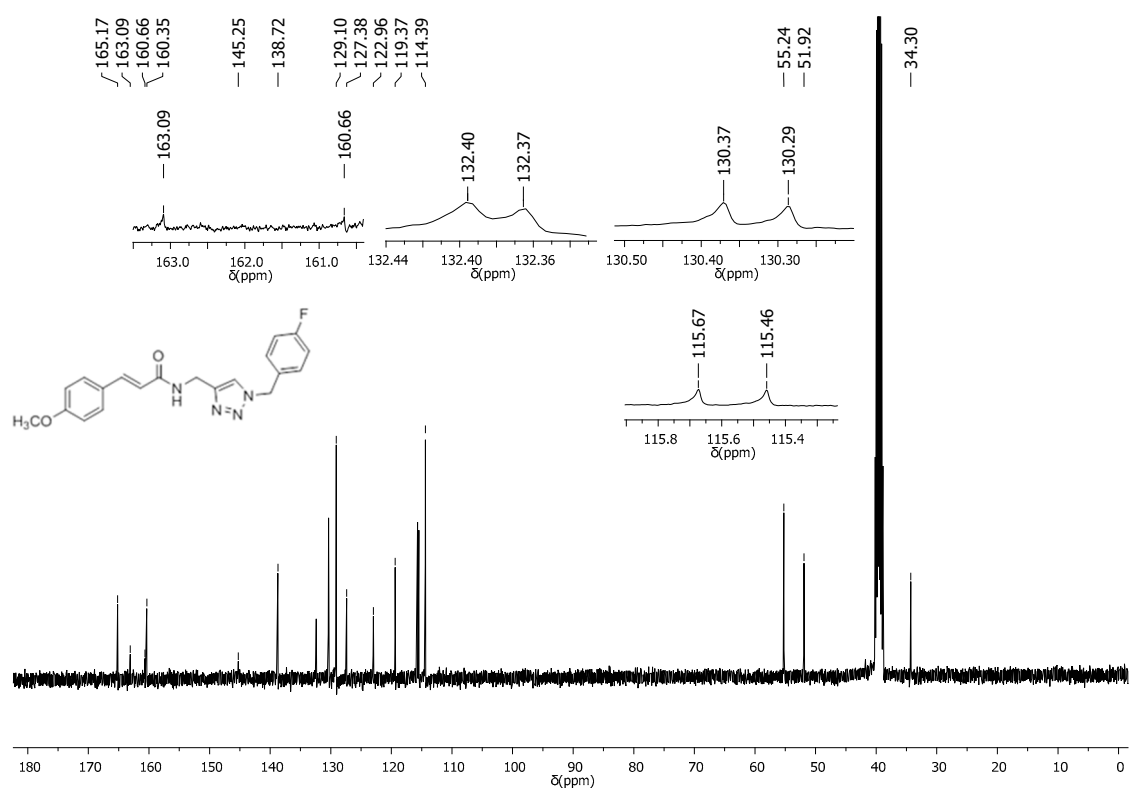

**Figure S11** - <sup>13</sup>C NMR spectrum (100 MHz, DMSO-*d*<sub>6</sub>) of 7.

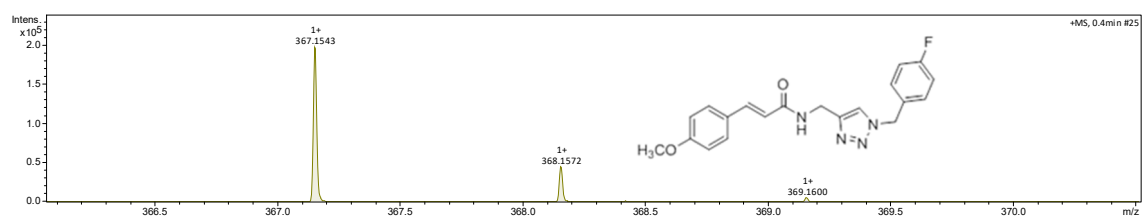

**Figure S12** - HRMS spectrum of 7.



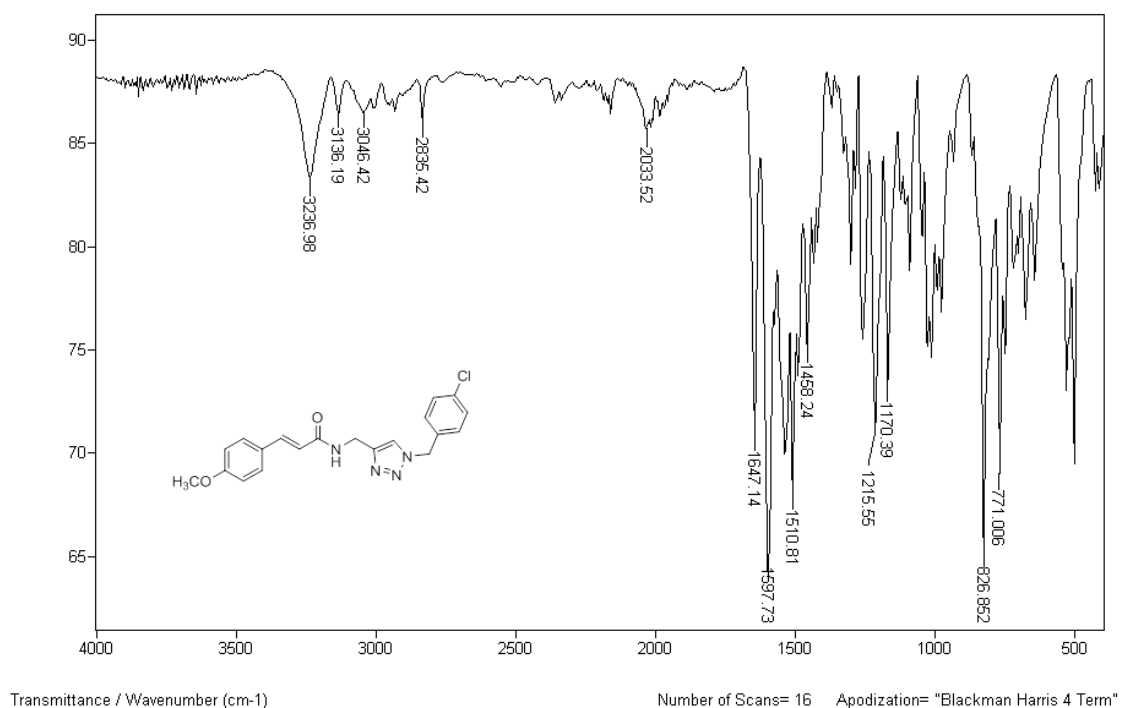

**Figure S13** - IR spectrum (ATR) of **8**.

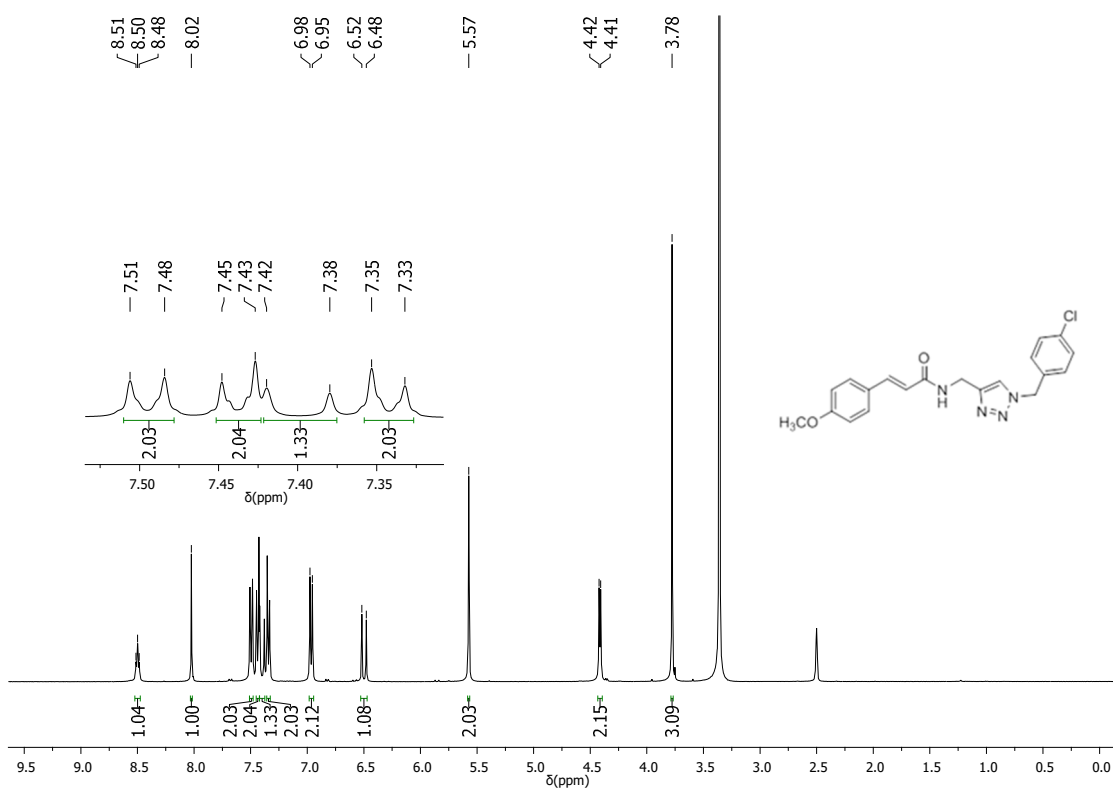

**Figure S14** - <sup>1</sup>H NMR spectrum (400 MHz, DMSO-*d*<sub>6</sub>) of **8**.

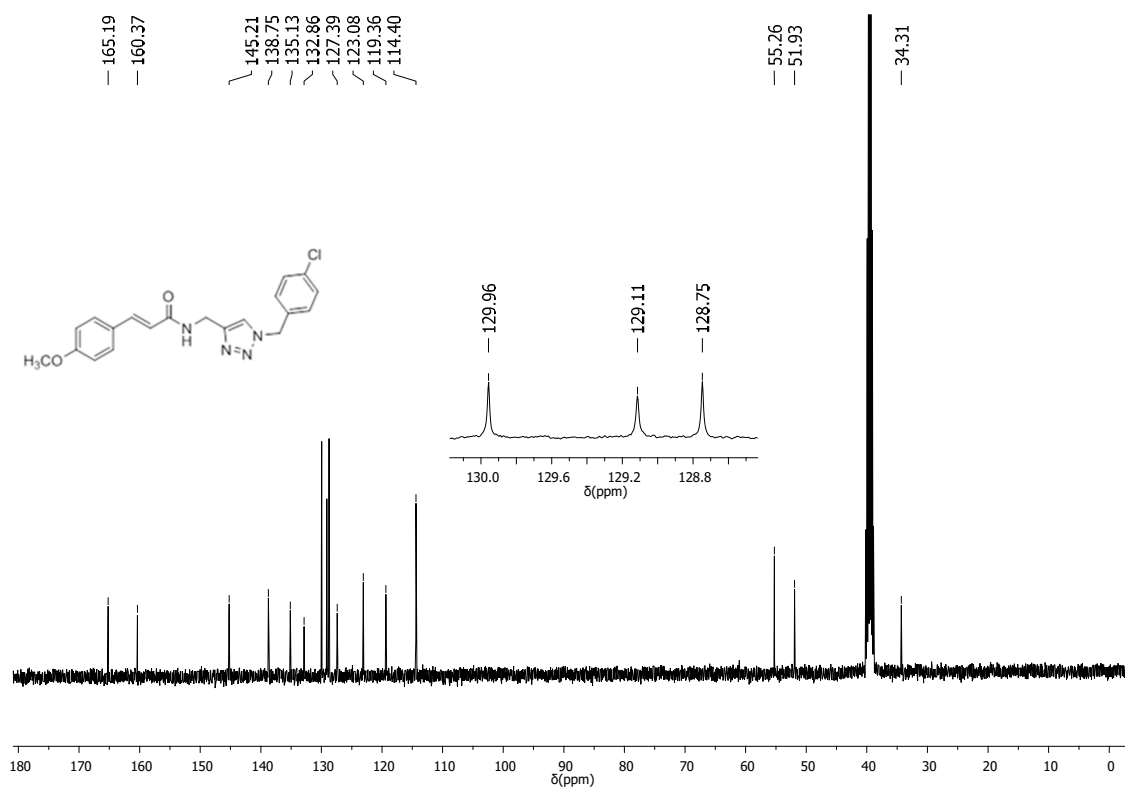

**Figure S15** - <sup>13</sup>C NMR spectrum (100 MHz, DMSO-*d*<sub>6</sub>) of **8**.

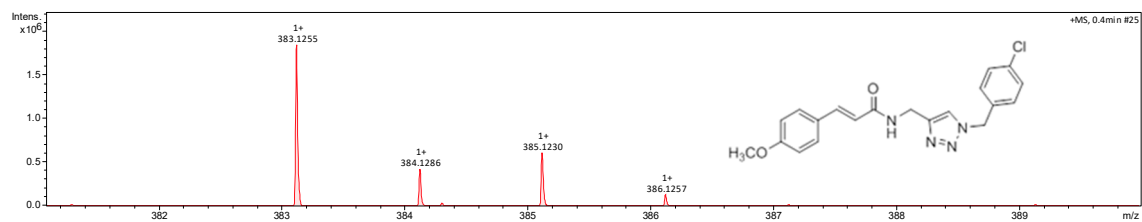

**Figure S16** - HRMS spectrum of **8**.

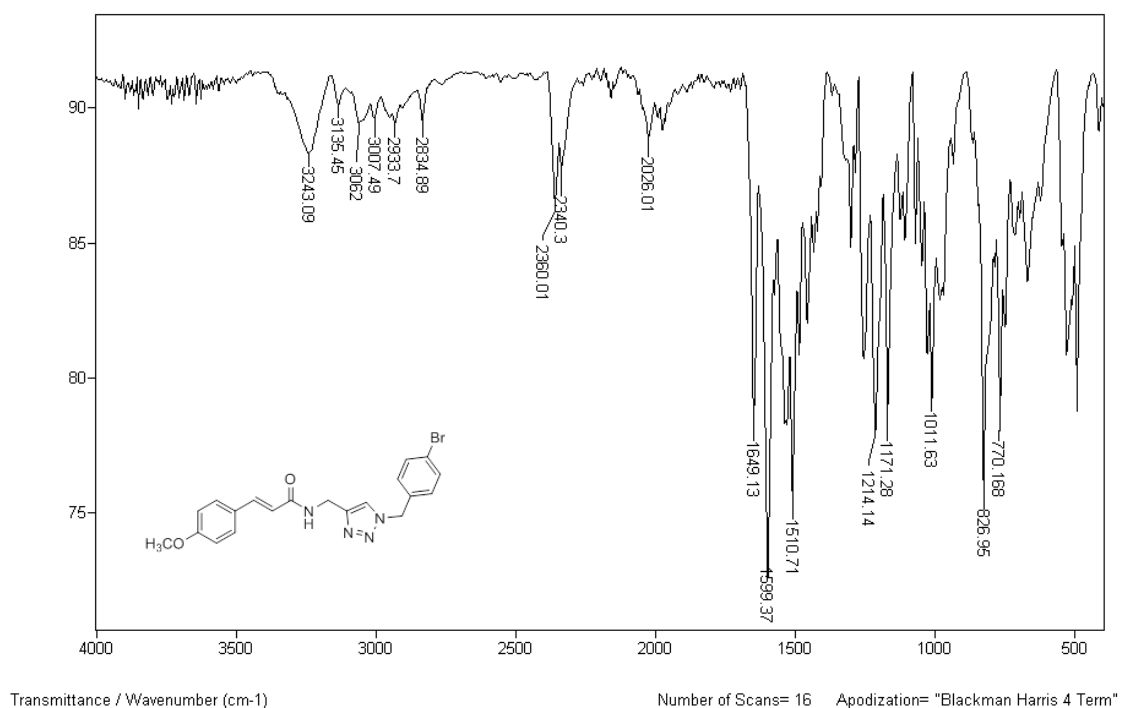

**Figure S17 - IR spectrum (ATR) of 9.**

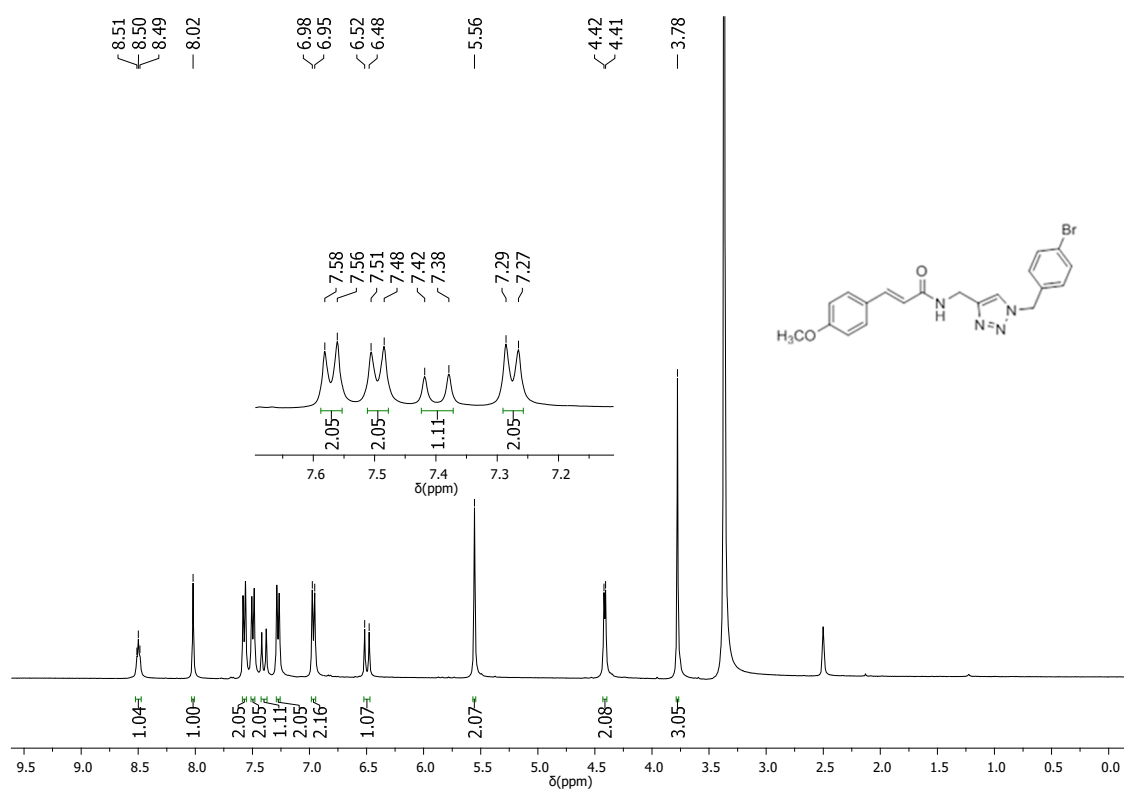

**Figure S18 - <sup>1</sup>H NMR spectrum (400 MHz, DMSO-*d*<sub>6</sub>) of 9.**

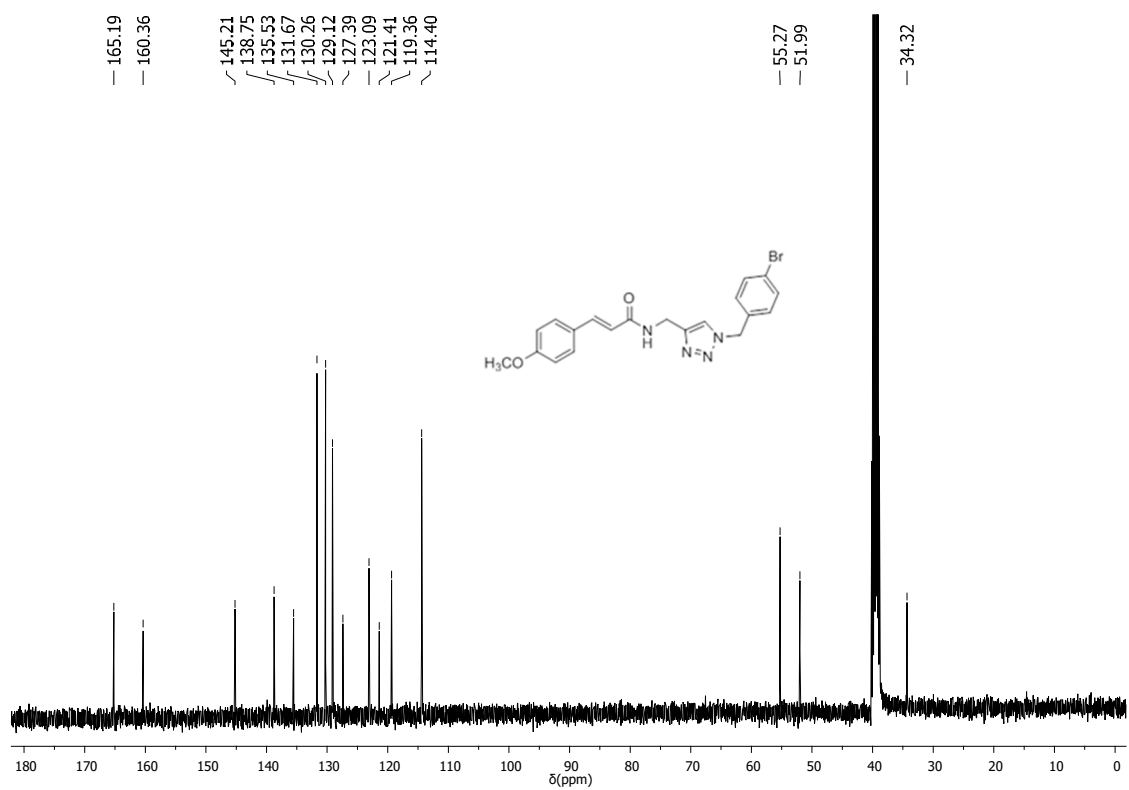

**Figure S19** - <sup>13</sup>C NMR spectrum (100 MHz, DMSO-*d*<sub>6</sub>) of **9**.

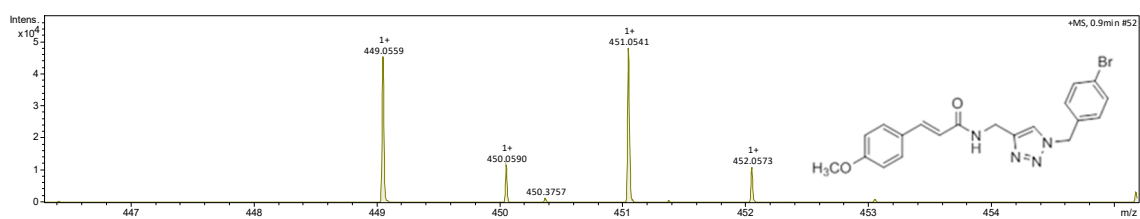

**Figure S20** - HRMS spectrum of **9**.

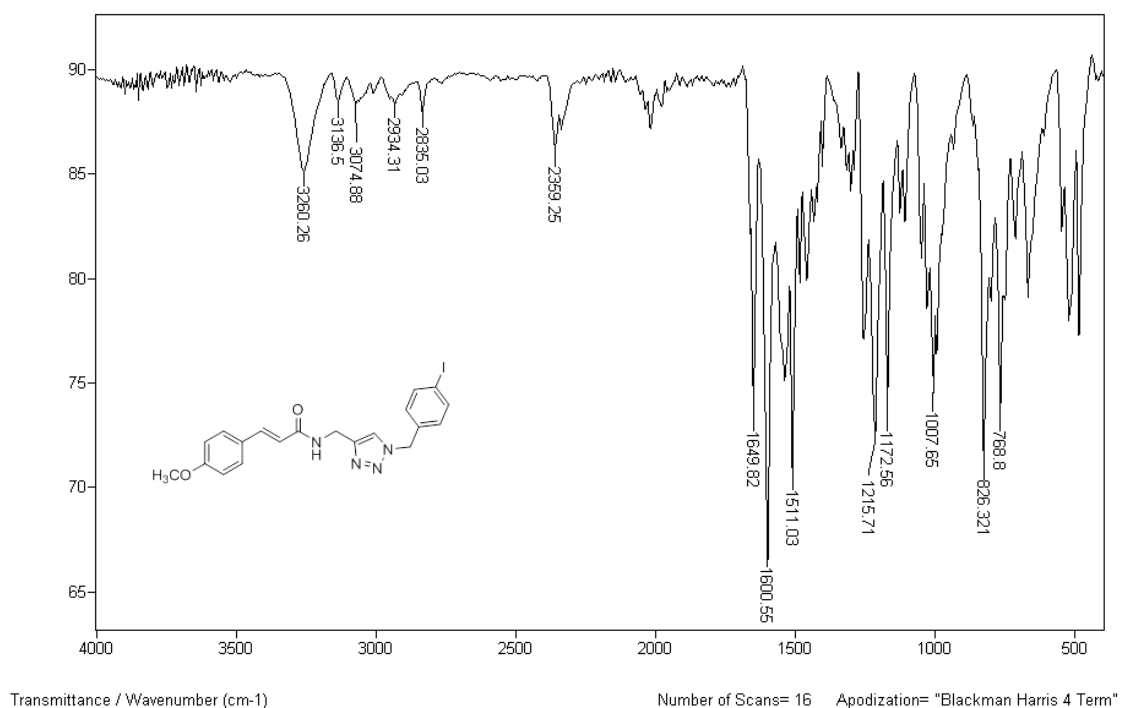

**Figure S21** - IR spectrum (ATR) of **10**.

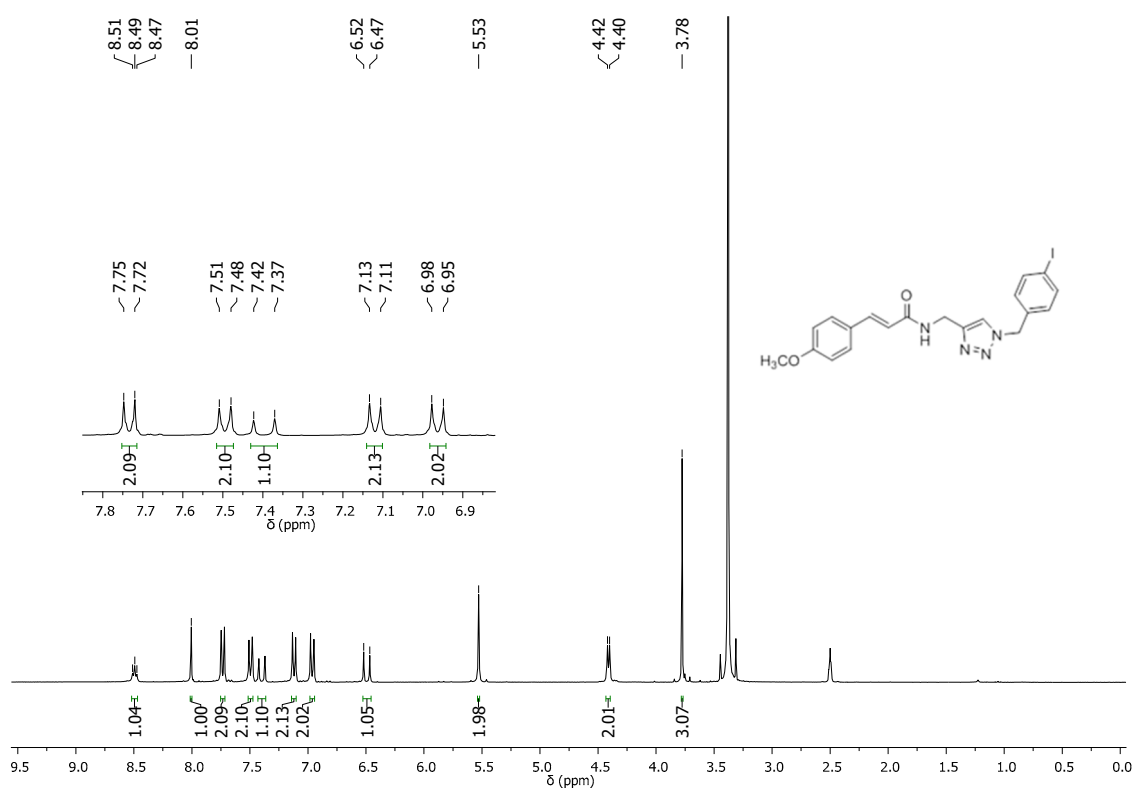

**Figure S22** -  $^1\text{H}$  NMR spectrum (400 MHz,  $\text{DMSO}-d_6$ ) of **10**.

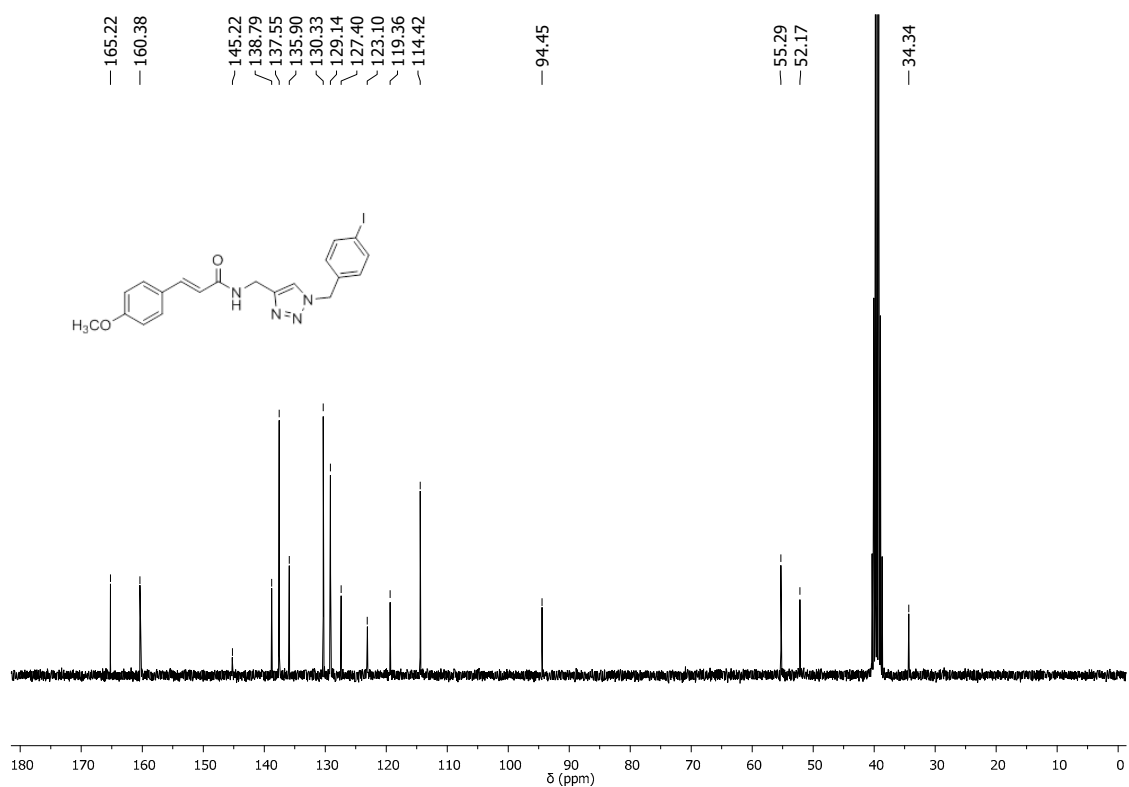

**Figure S23** - <sup>13</sup>C NMR spectrum (100 MHz, DMSO-*d*<sub>6</sub>) of **10**.

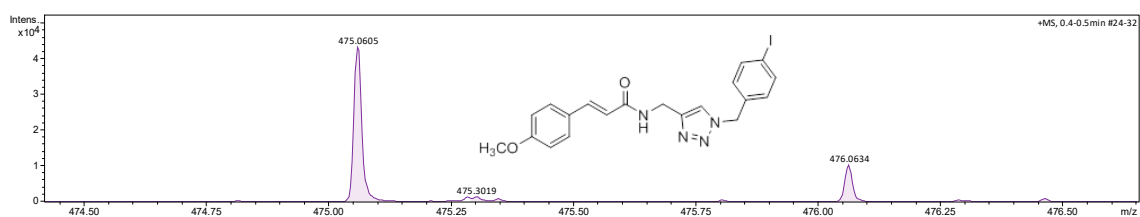

**Figure S24** - HRMS spectrum of **10**.

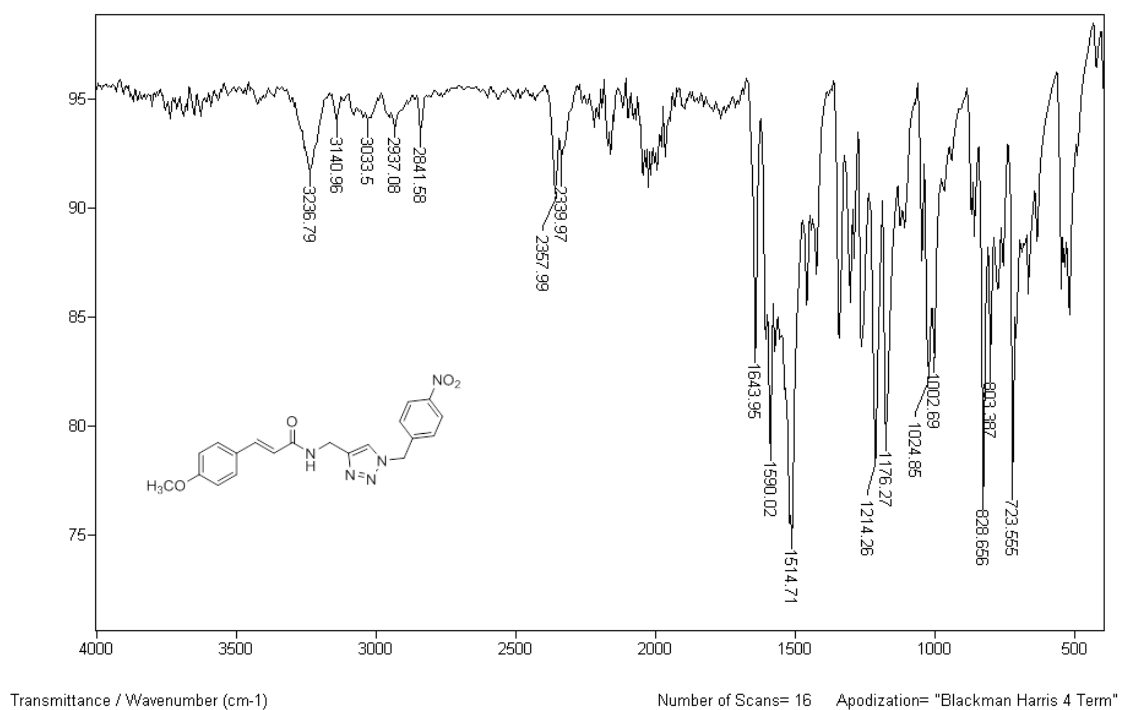

**Figure S25 - IR spectrum (ATR) of 11.**

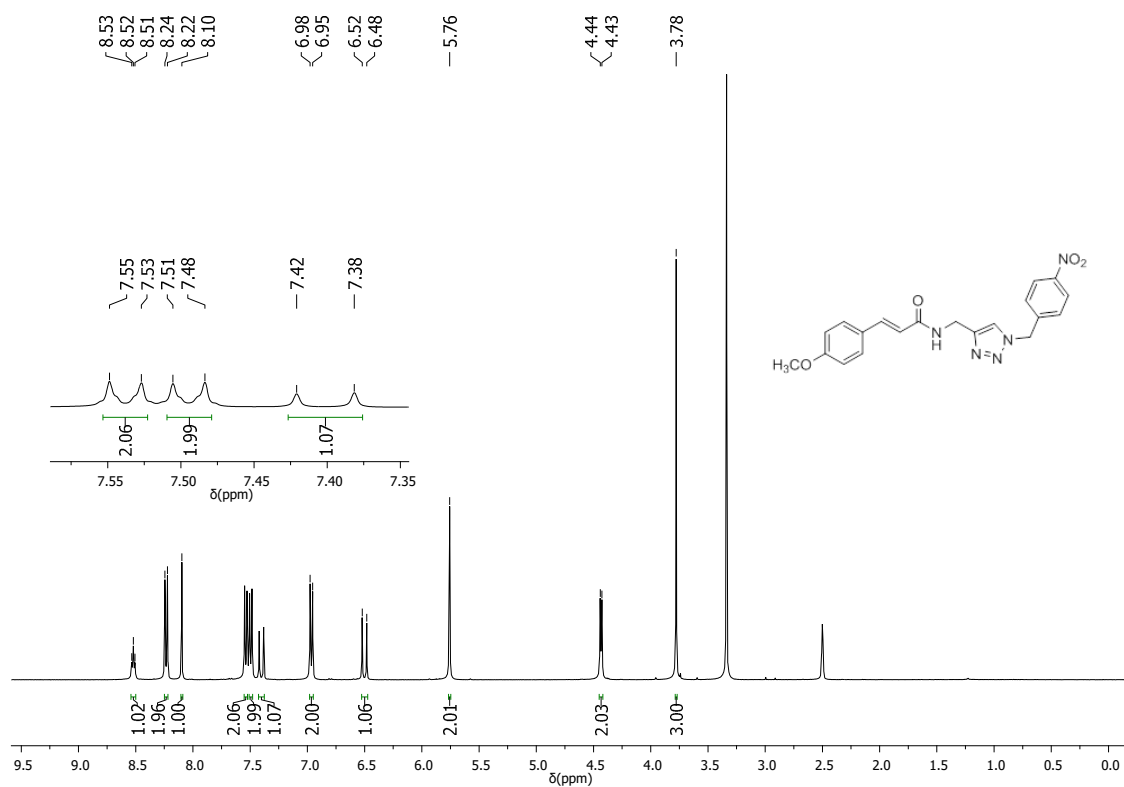

**Figure S26 - <sup>1</sup>H NMR spectrum (400 MHz, DMSO-*d*<sub>6</sub>) of 11.**

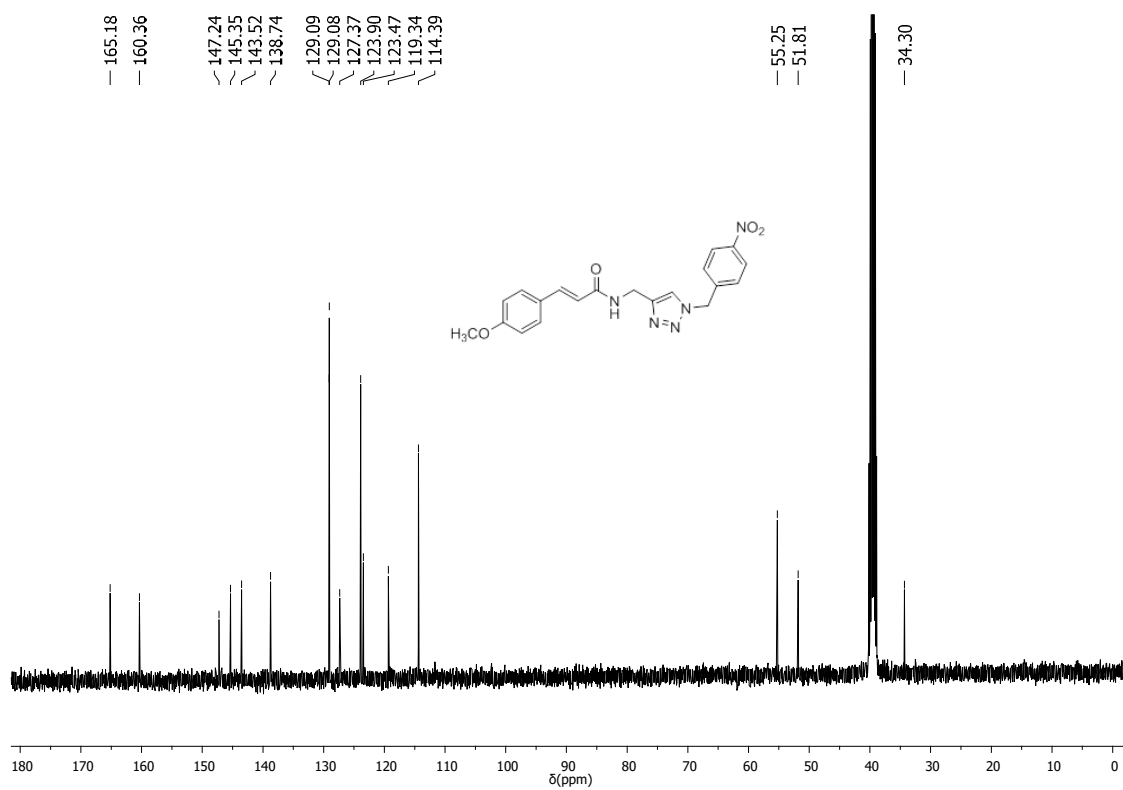

**Figure S27** - <sup>13</sup>C NMR spectrum (100 MHz, DMSO-*d*<sub>6</sub>) of **11**.

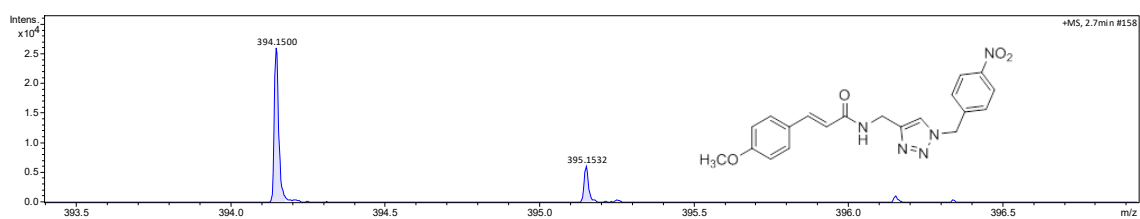

**Figure S28** - HRMS spectrum of **11**.



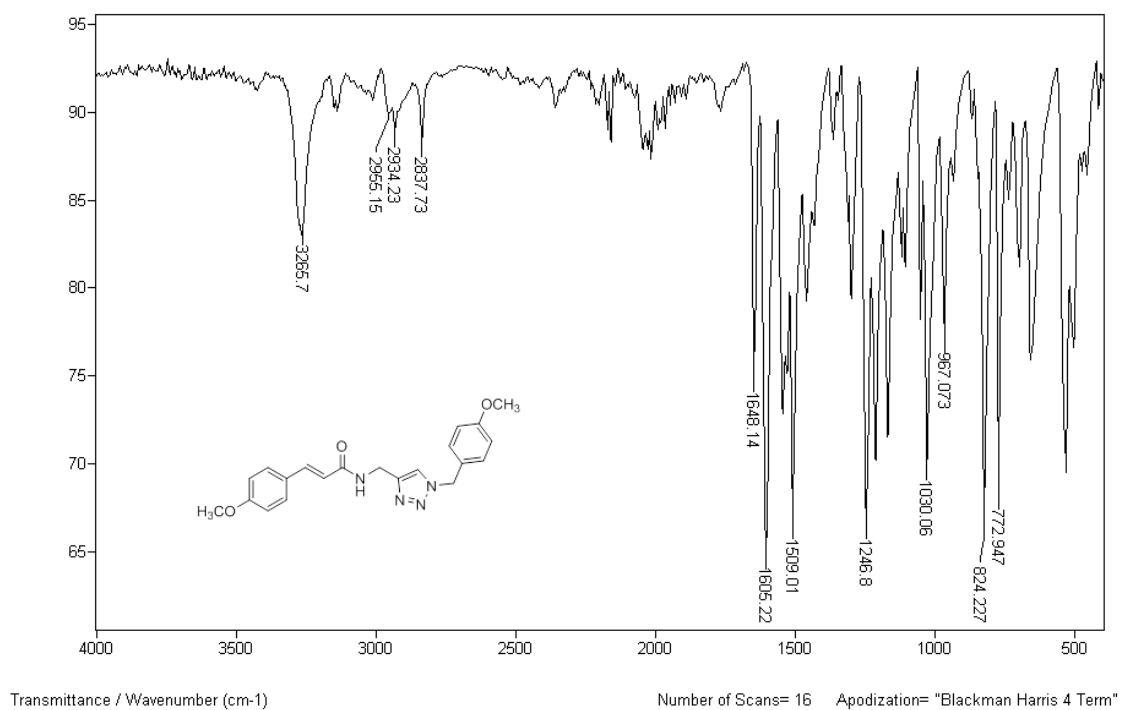

**Figure S29** - IR spectrum (ATR) of **12**.

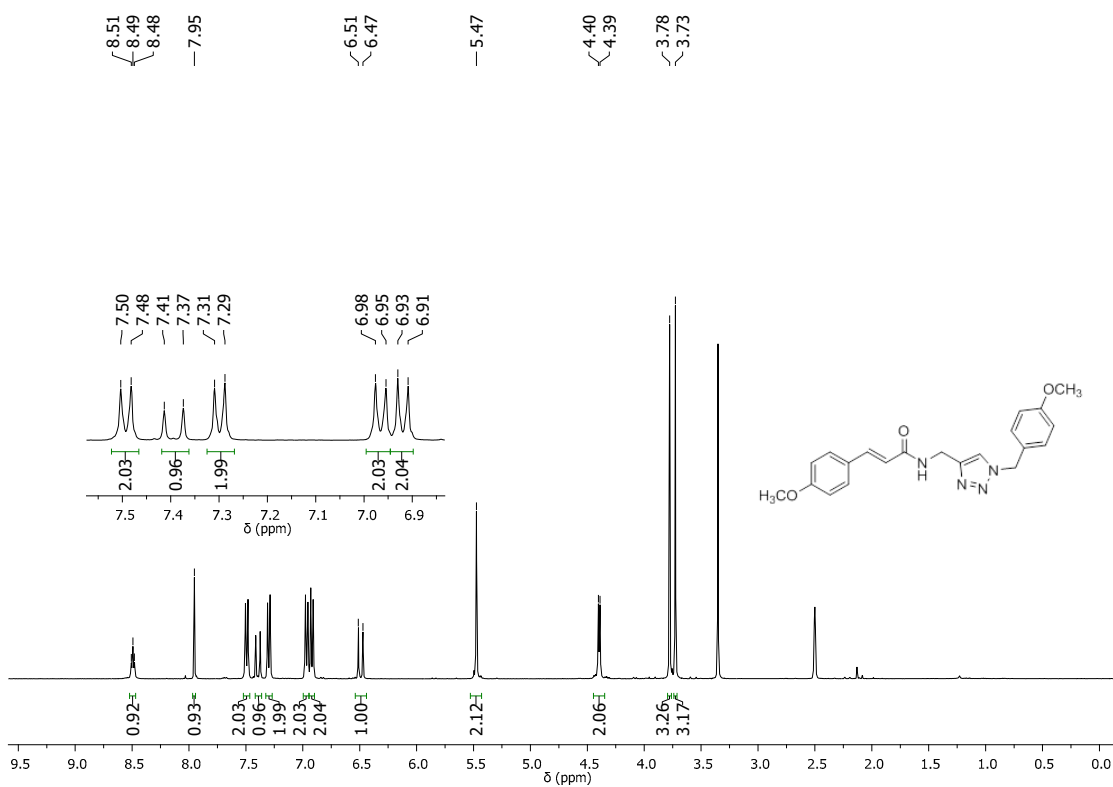

**Figure S30** - <sup>1</sup>H NMR spectrum (400 MHz, DMSO-*d*<sub>6</sub>) of **12**.

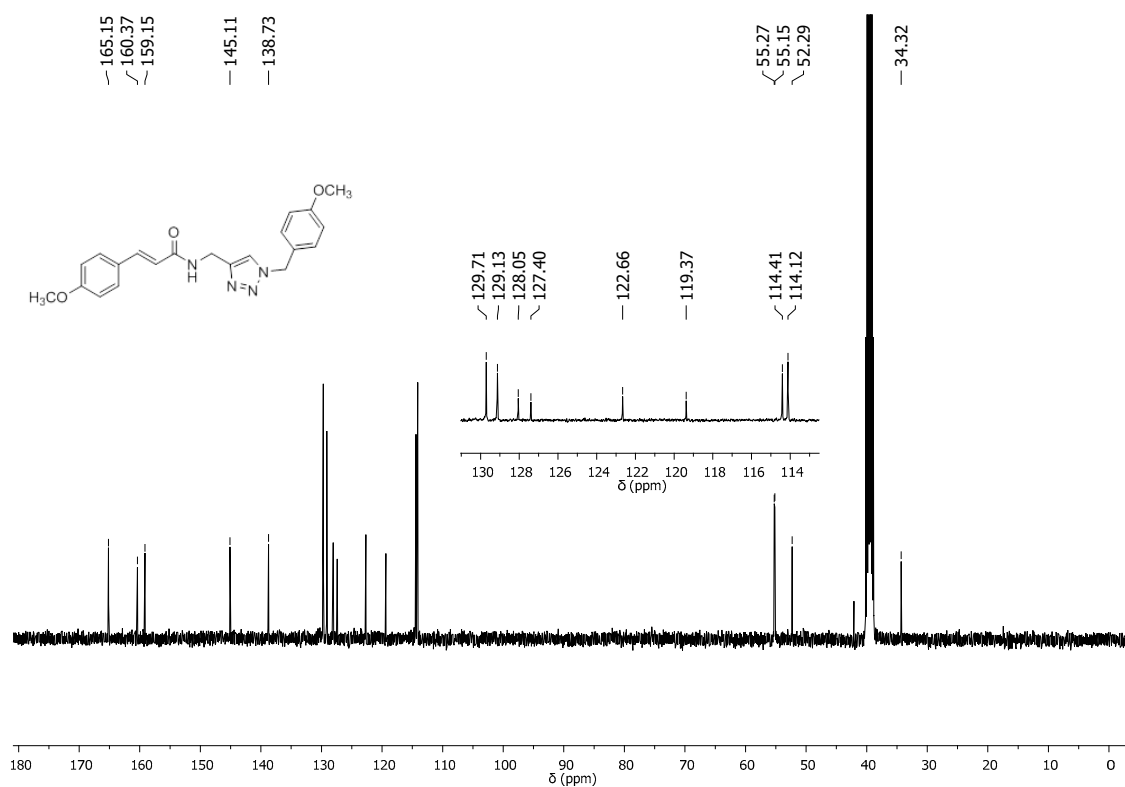

**Figure S31** - <sup>13</sup>C NMR spectrum (100 MHz, DMSO-*d*<sub>6</sub>) of **12**.

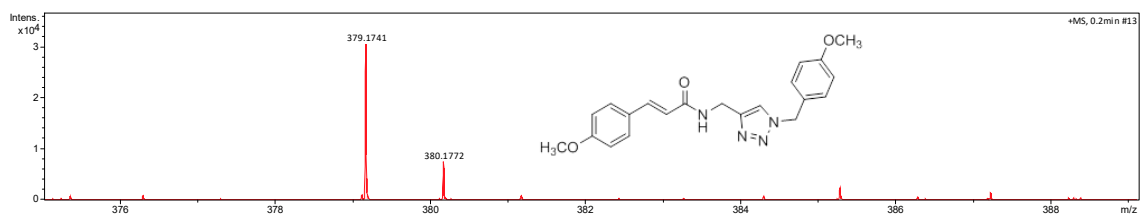

**Figure S32** - HRMS spectrum of **12**.

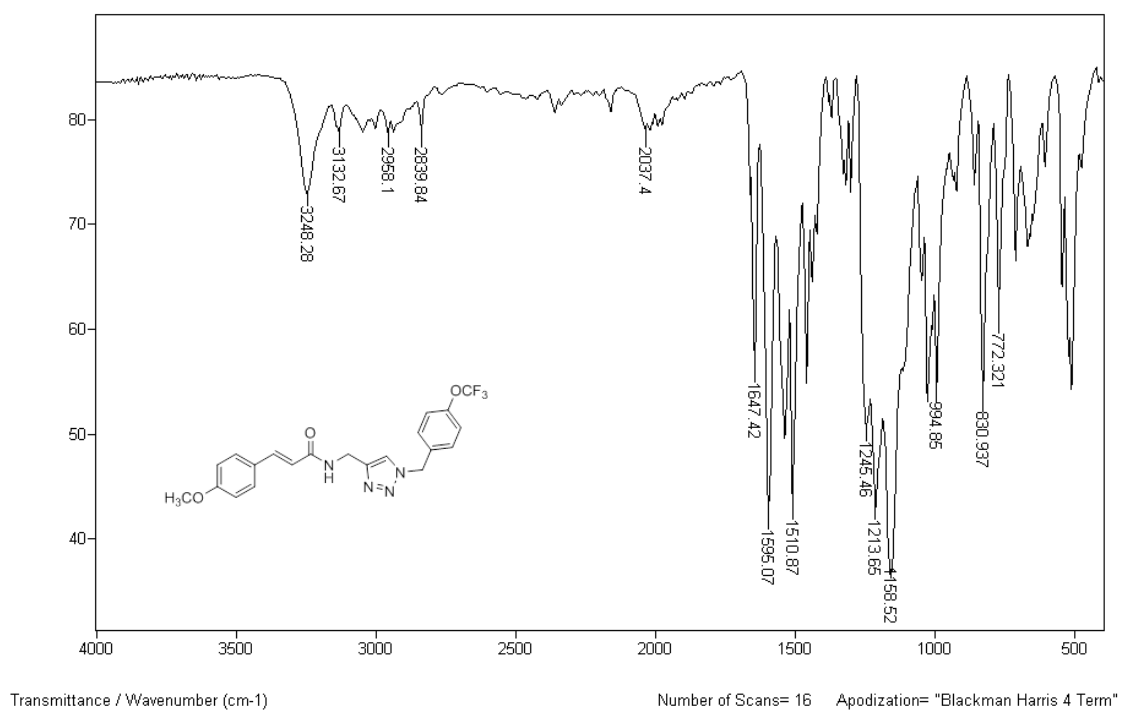

**Figure S33** - IR spectrum (ATR) of **13**.

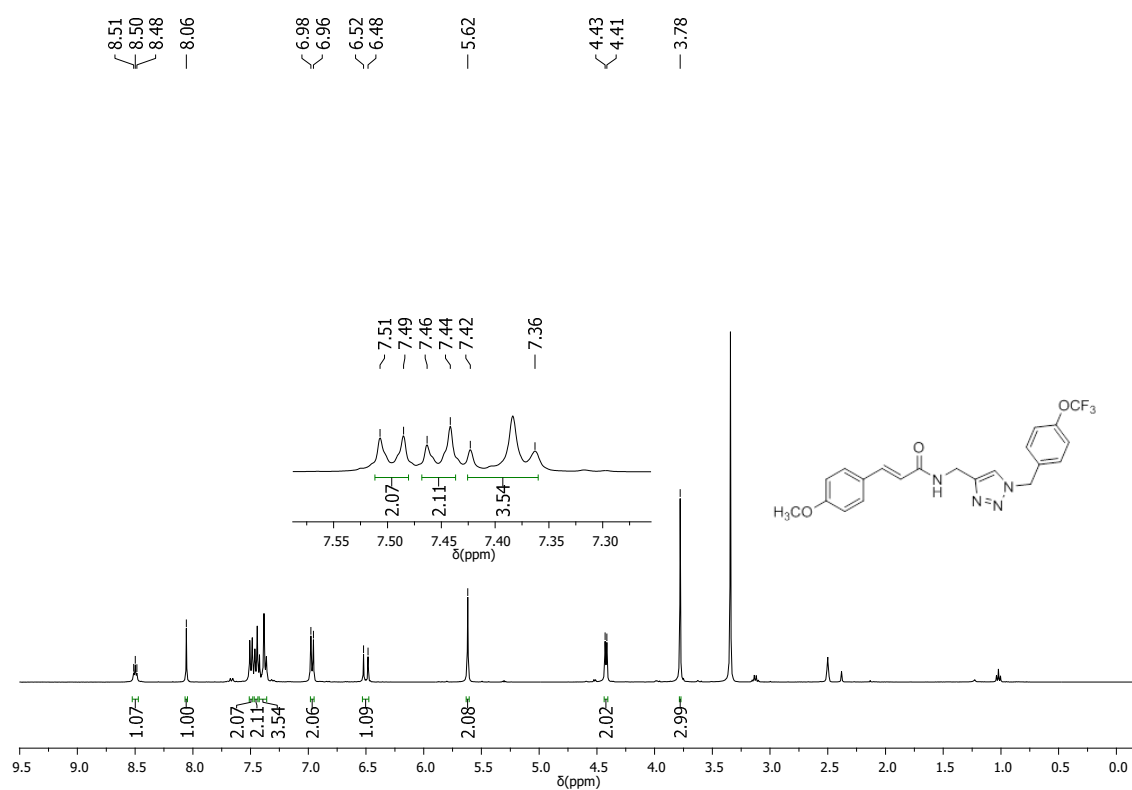

**Figure S34** - <sup>1</sup>H NMR spectrum (400 MHz, DMSO-*d*<sub>6</sub>) of **13**.

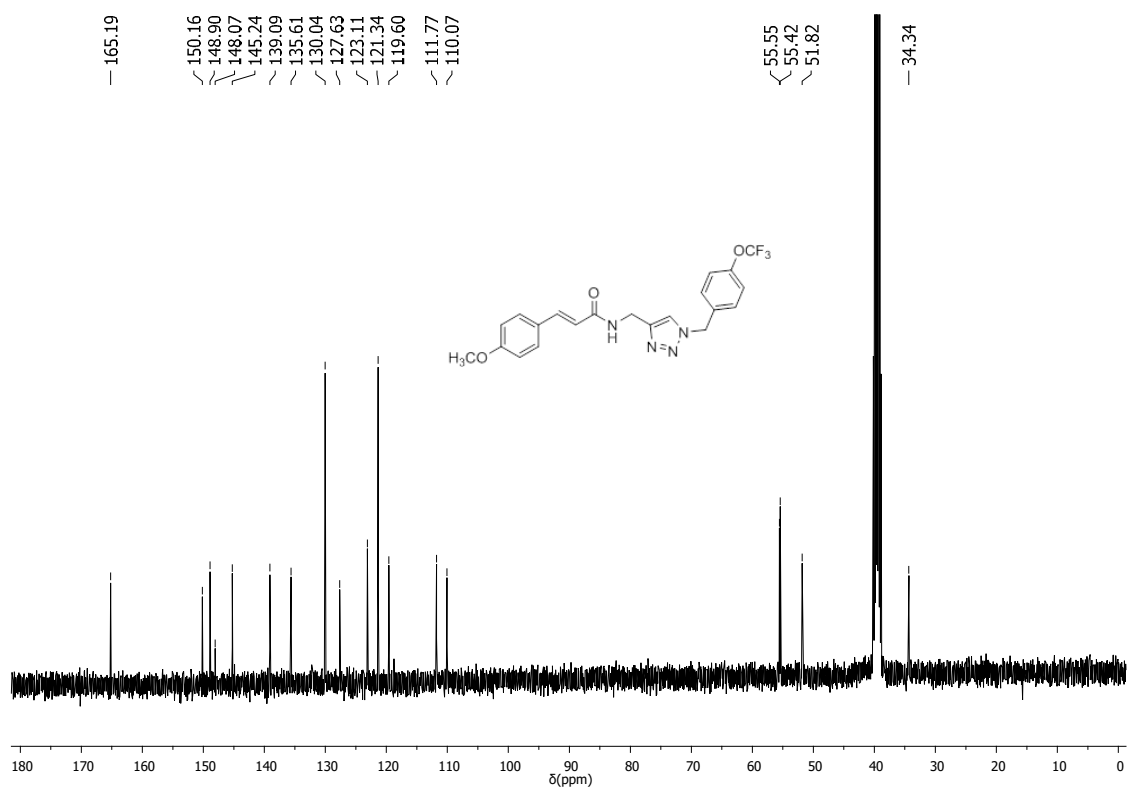

**Figure S35** - <sup>13</sup>C NMR spectrum (100 MHz, DMSO-*d*<sub>6</sub>) of **13**.

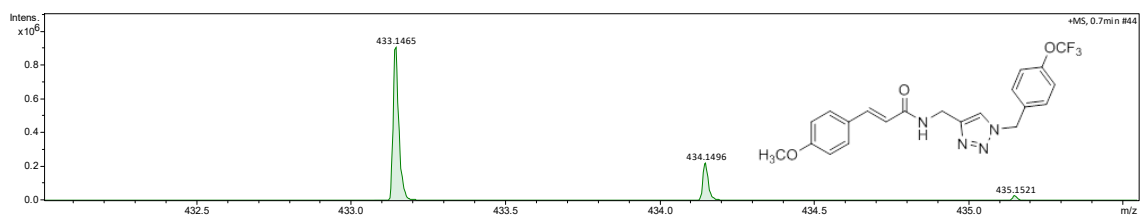

**Figure S36** - HRMS spectrum of **13**.

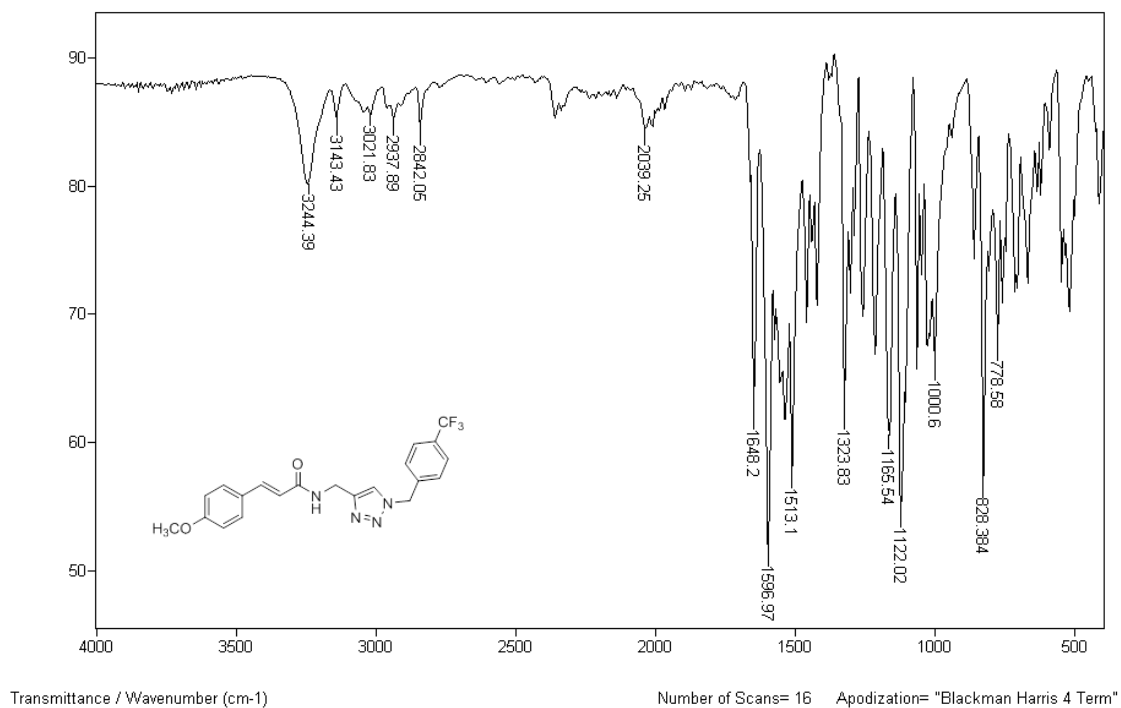

**Figure S37** - IR spectrum (ATR) of **14**.

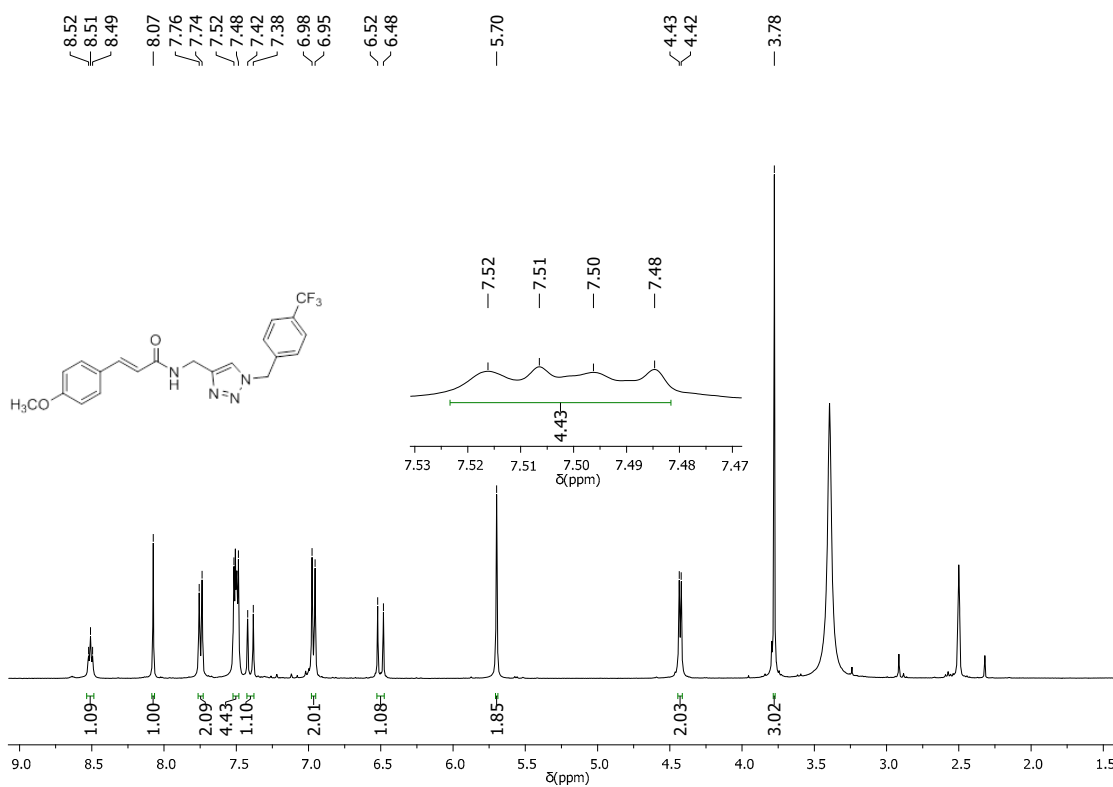

**Figure S38** - <sup>1</sup>H NMR spectrum (400 MHz, DMSO-*d*<sub>6</sub>) of **14**.

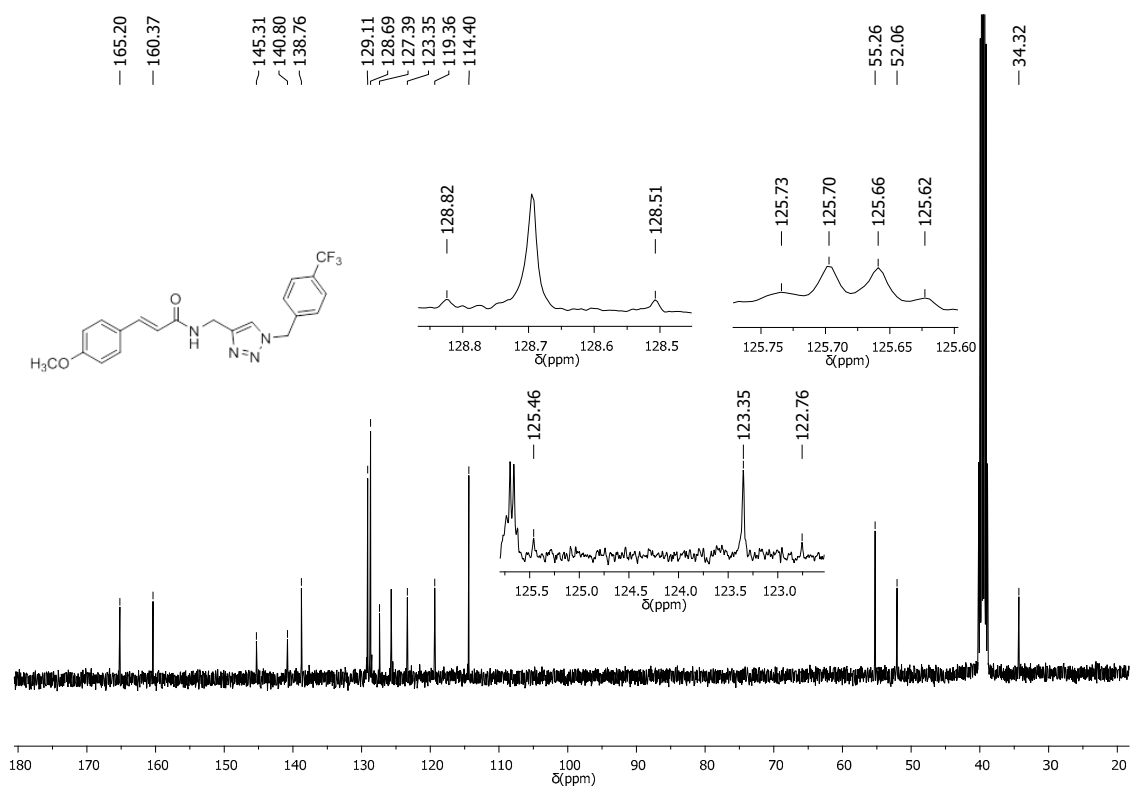

**Figure S39** - <sup>13</sup>C NMR spectrum (100 MHz, DMSO-*d*<sub>6</sub>) of **14**.

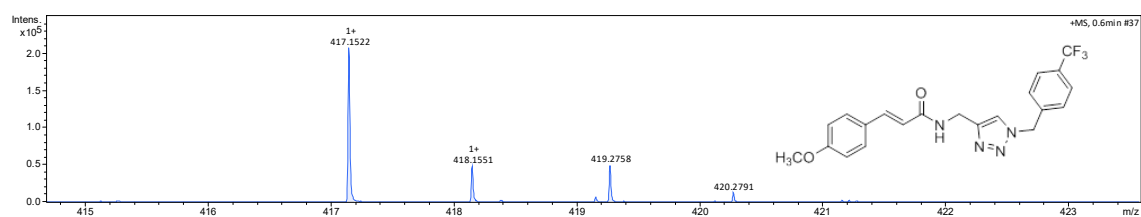

**Figure S40** - HRMS spectrum of **14**.

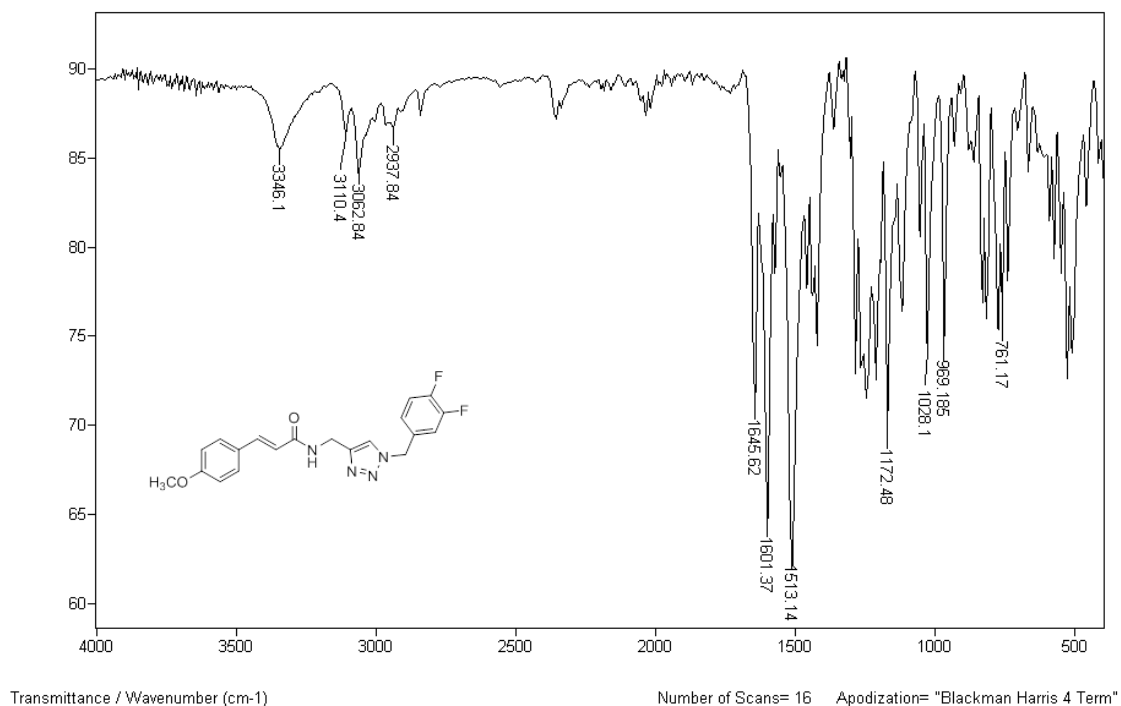

**Figure S41 - IR spectrum (ATR) of 15.**

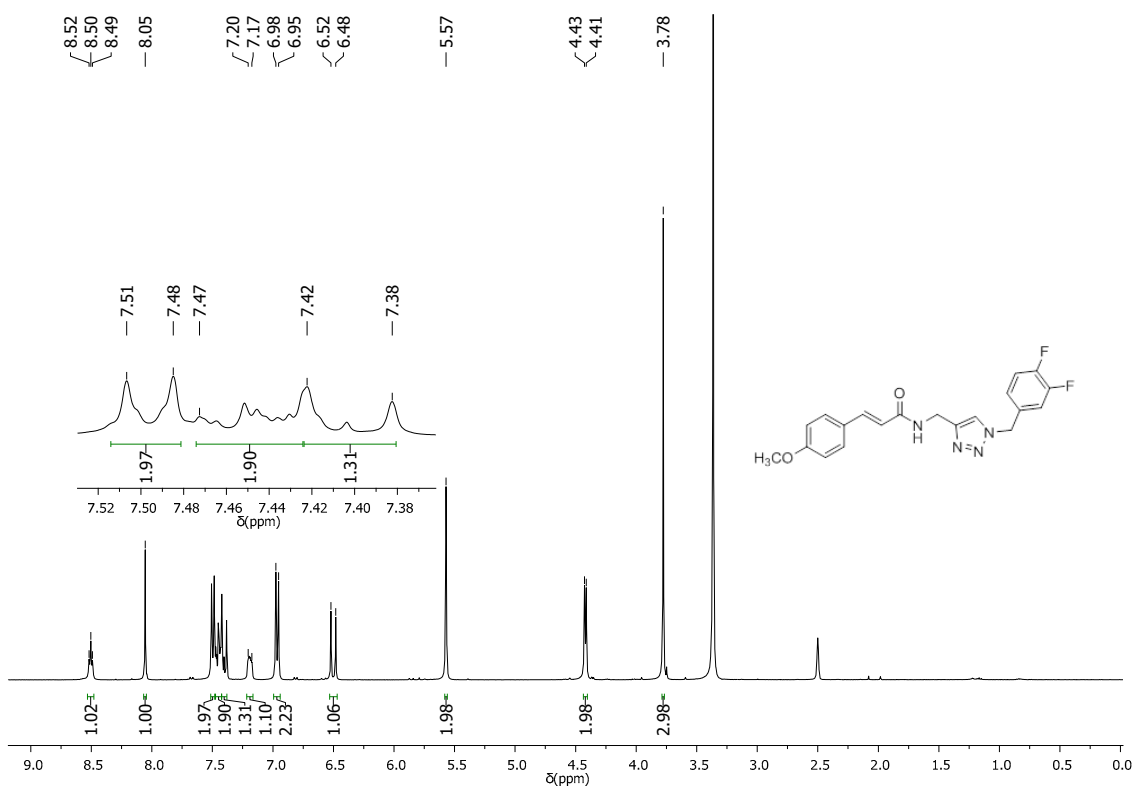

**Figure S42 - <sup>1</sup>H NMR spectrum (400 MHz, DMSO-*d*<sub>6</sub>) of 15.**

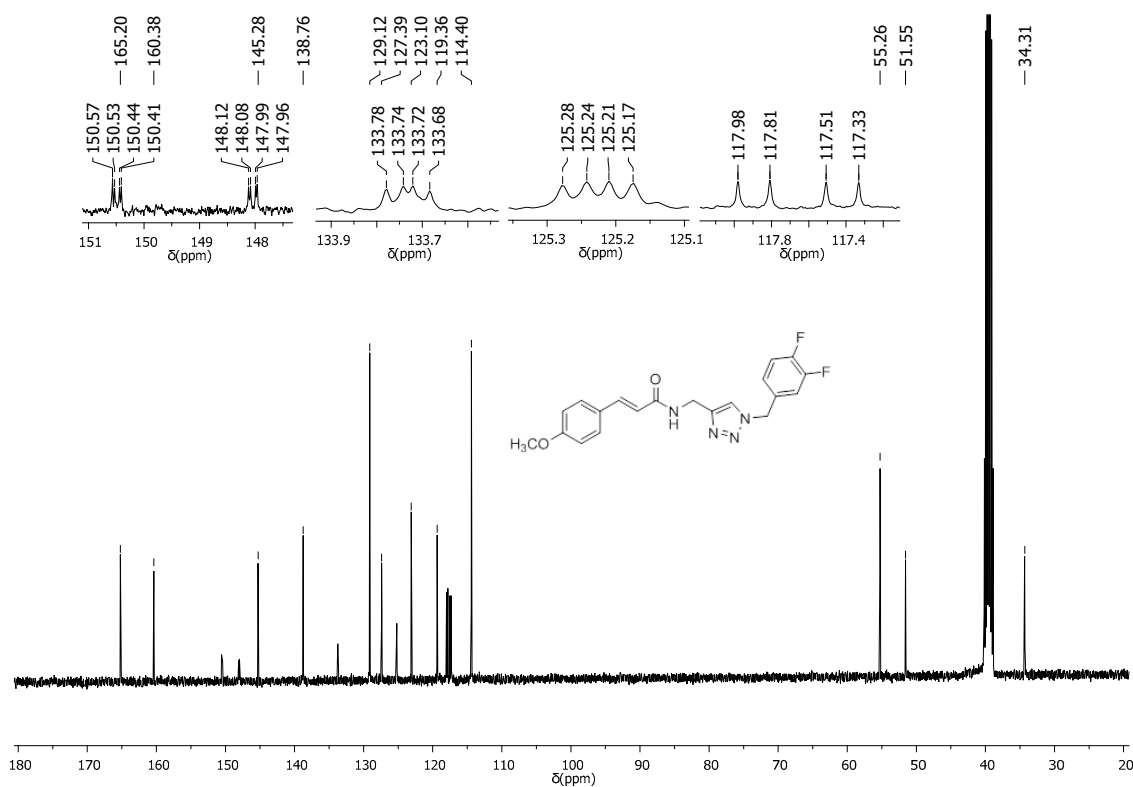

**Figure S43** - <sup>13</sup>C NMR spectrum (100 MHz, DMSO-*d*<sub>6</sub>) of **15**.

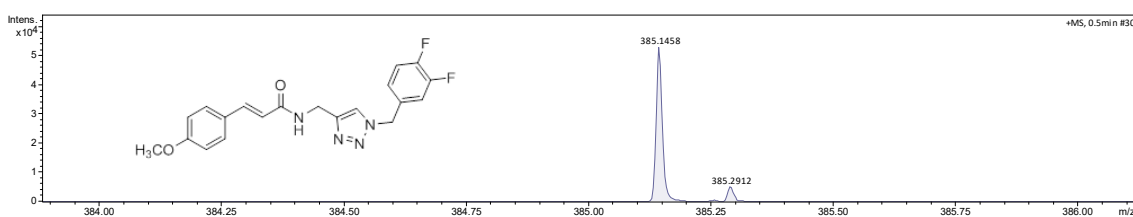

**Figure S44** - HRMS spectrum of **15**.



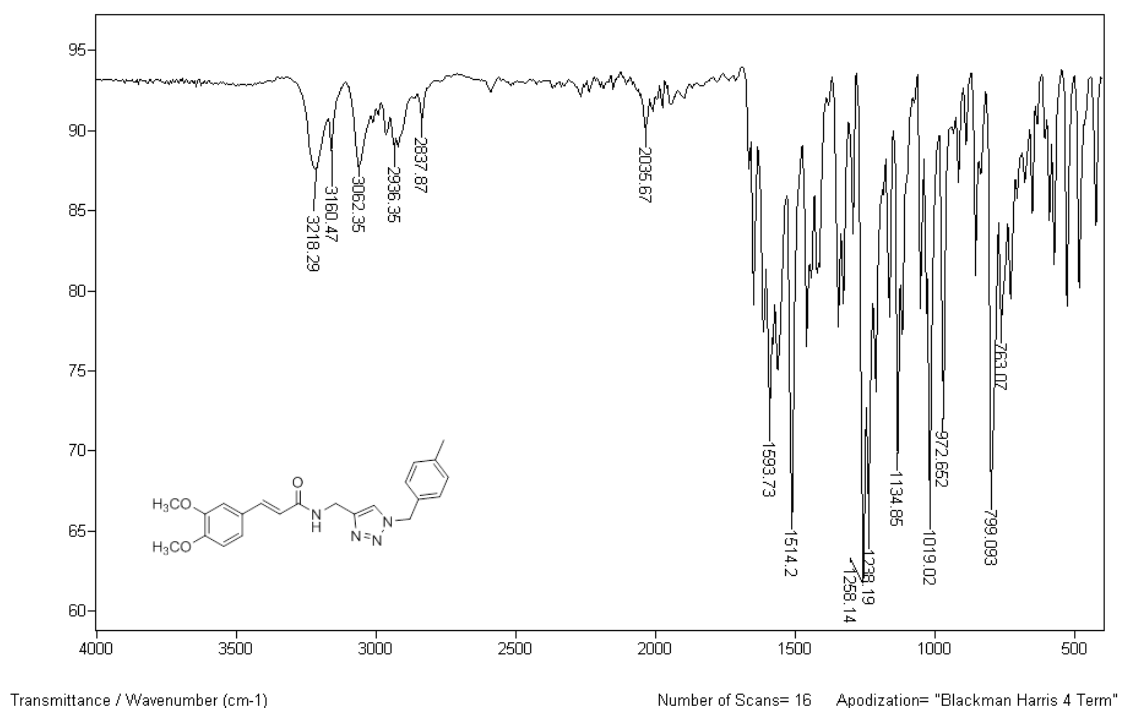

**Figure S45 - IR spectrum (ATR) of 16.**

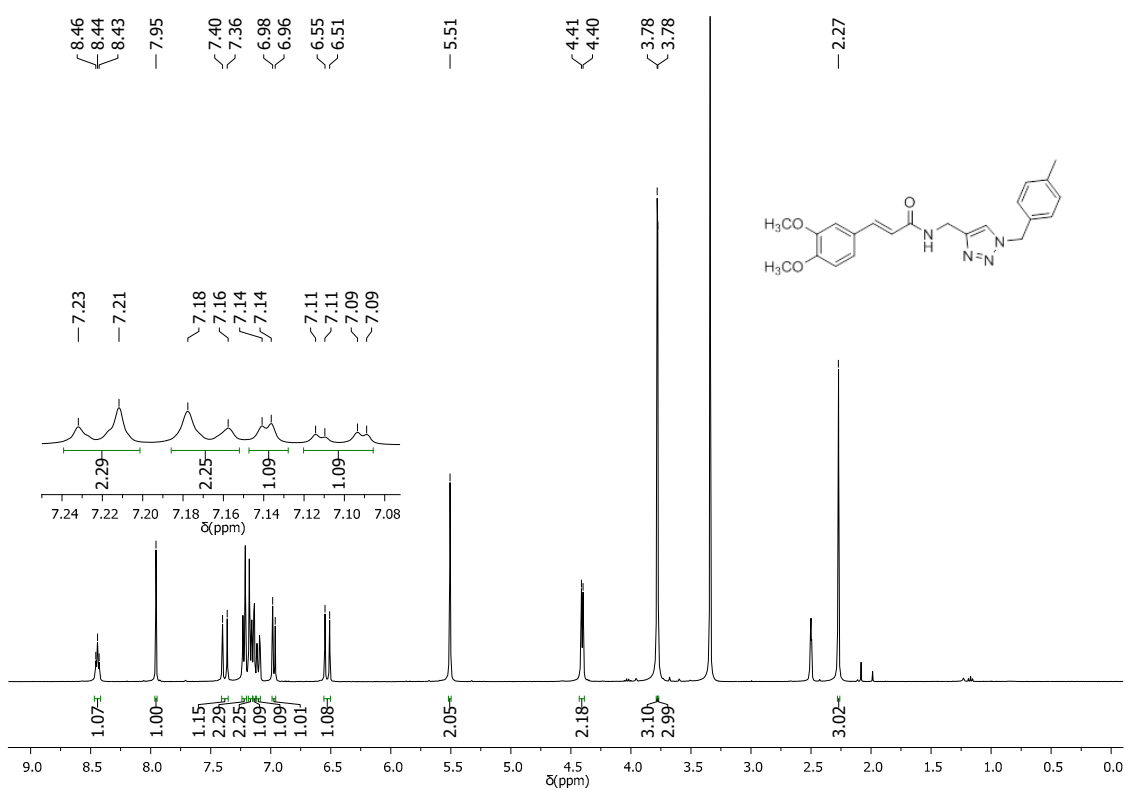

**Figure S46 - <sup>1</sup>H NMR spectrum (400 MHz, DMSO-*d*<sub>6</sub>) of 16.**

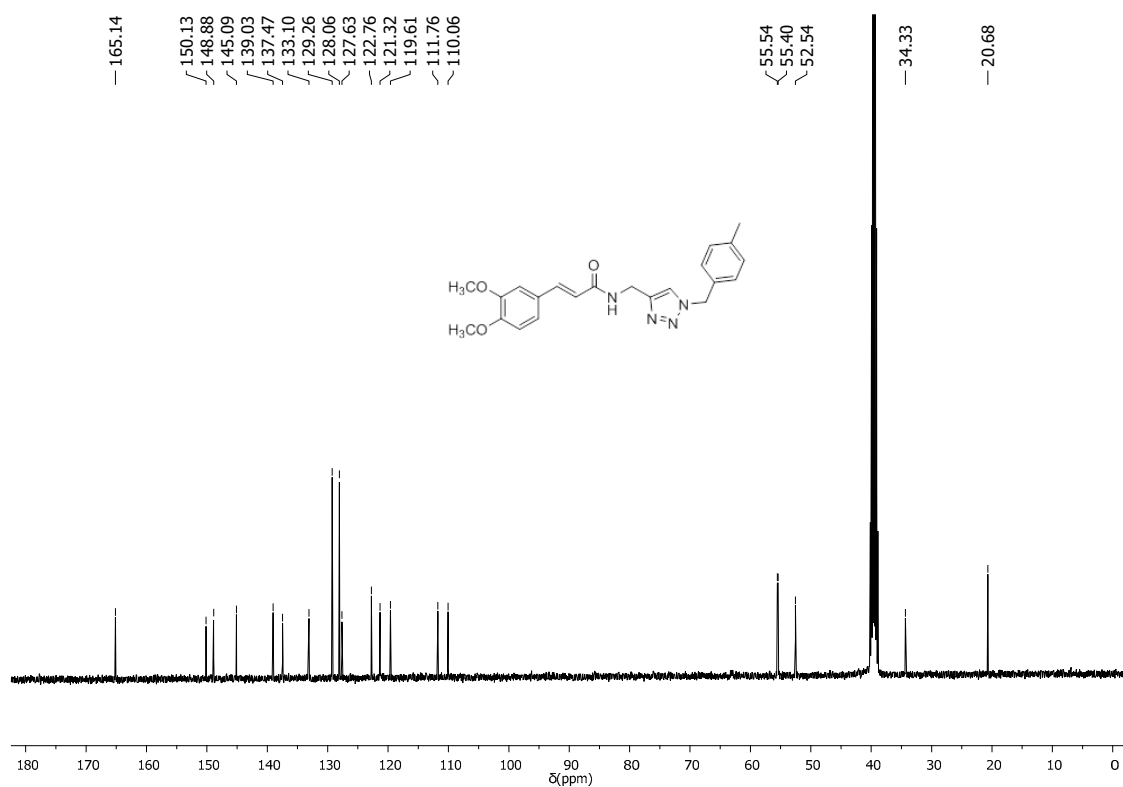

Figure S47 - <sup>13</sup>C NMR spectrum (100 MHz, DMSO-*d*<sub>6</sub>) of **16**.

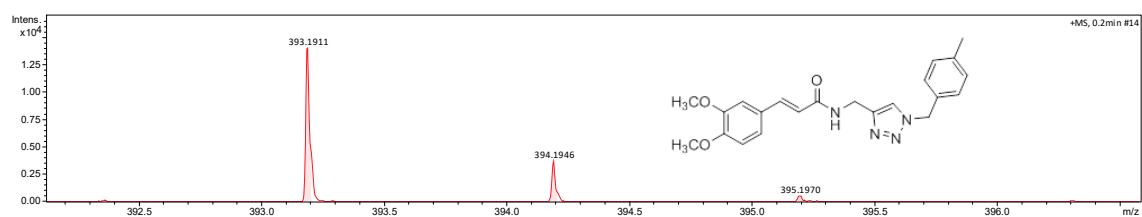

Figure S48 - HRMS spectrum of **16**.

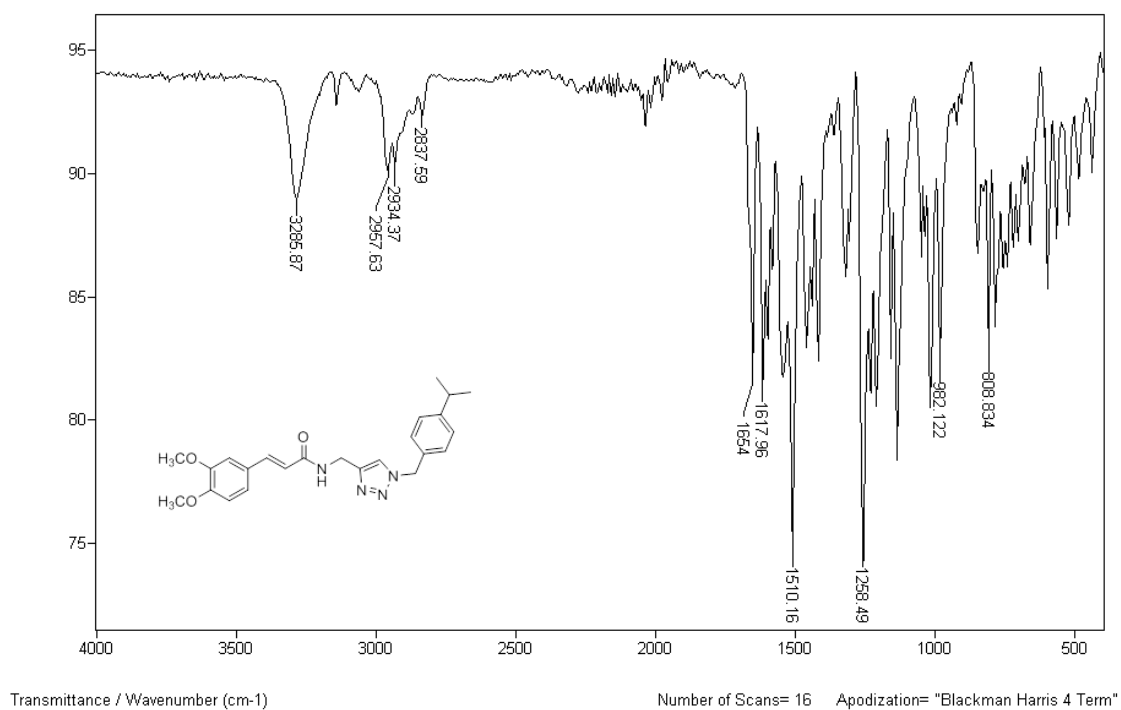

**Figure S49** - IR spectrum (ATR) of **17**.

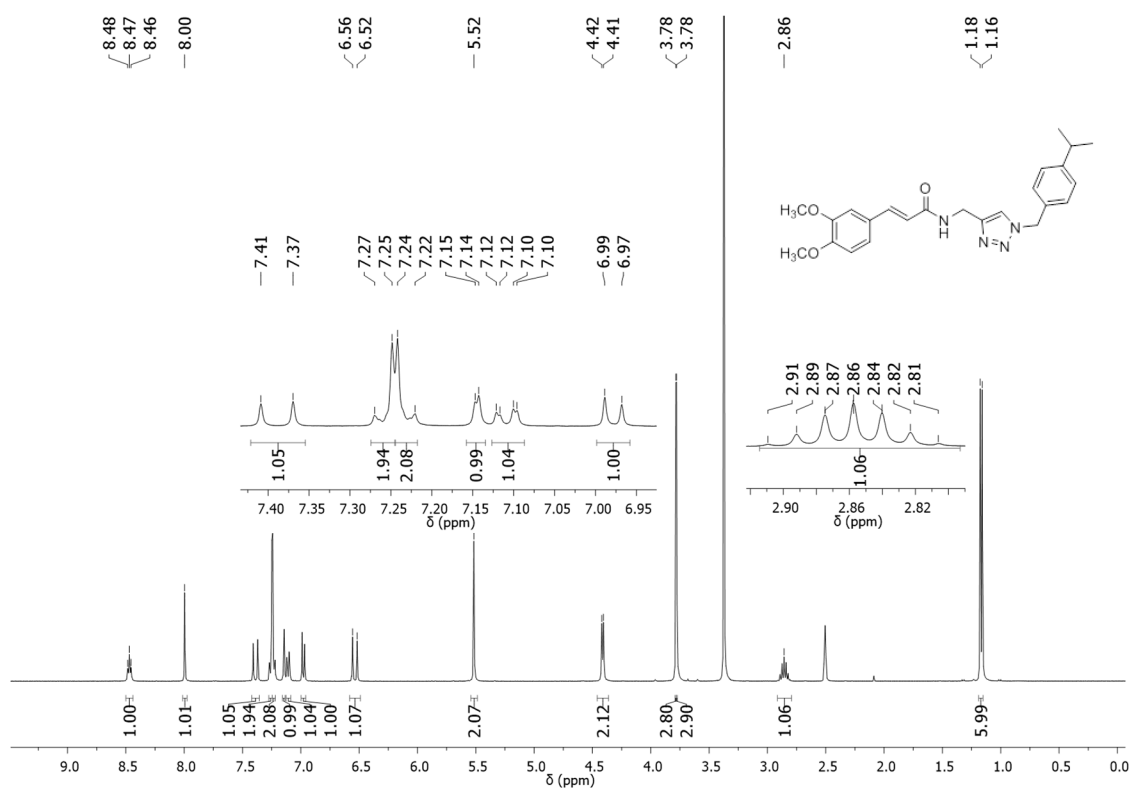

**Figure S50** - <sup>1</sup>H NMR spectrum (400 MHz, DMSO-*d*<sub>6</sub>) of **17**.

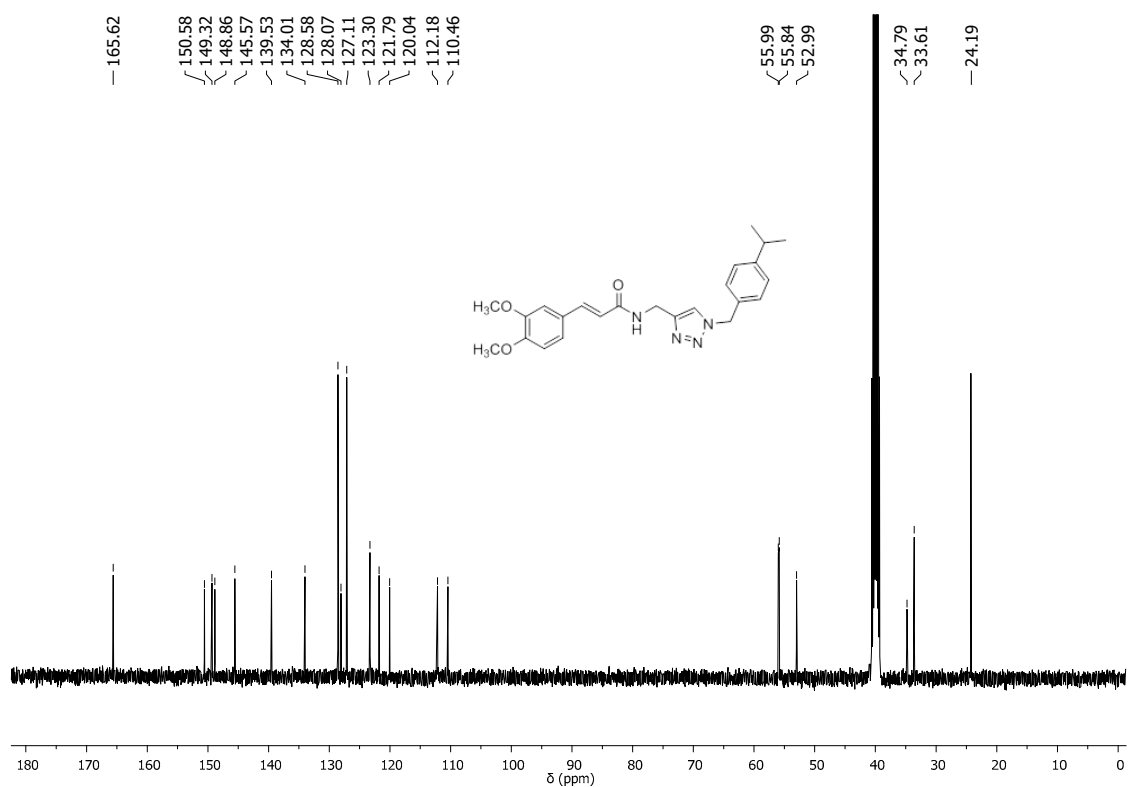

**Figure S51** - <sup>13</sup>C NMR spectrum (100 MHz, DMSO-*d*<sub>6</sub>) of **17**.

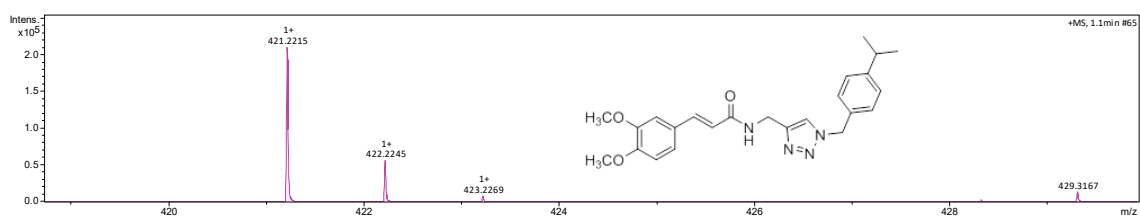

**Figure S52** - HRMS spectrum of **17**.

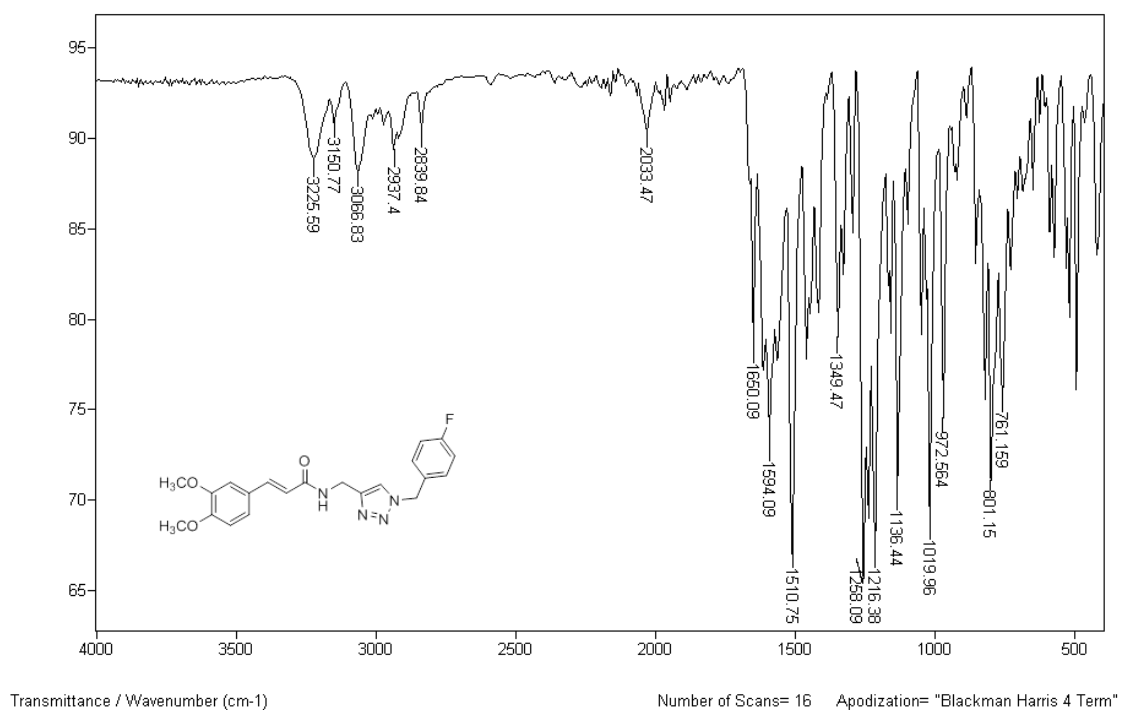

**Figure S53 - IR spectrum (ATR) of 18.**

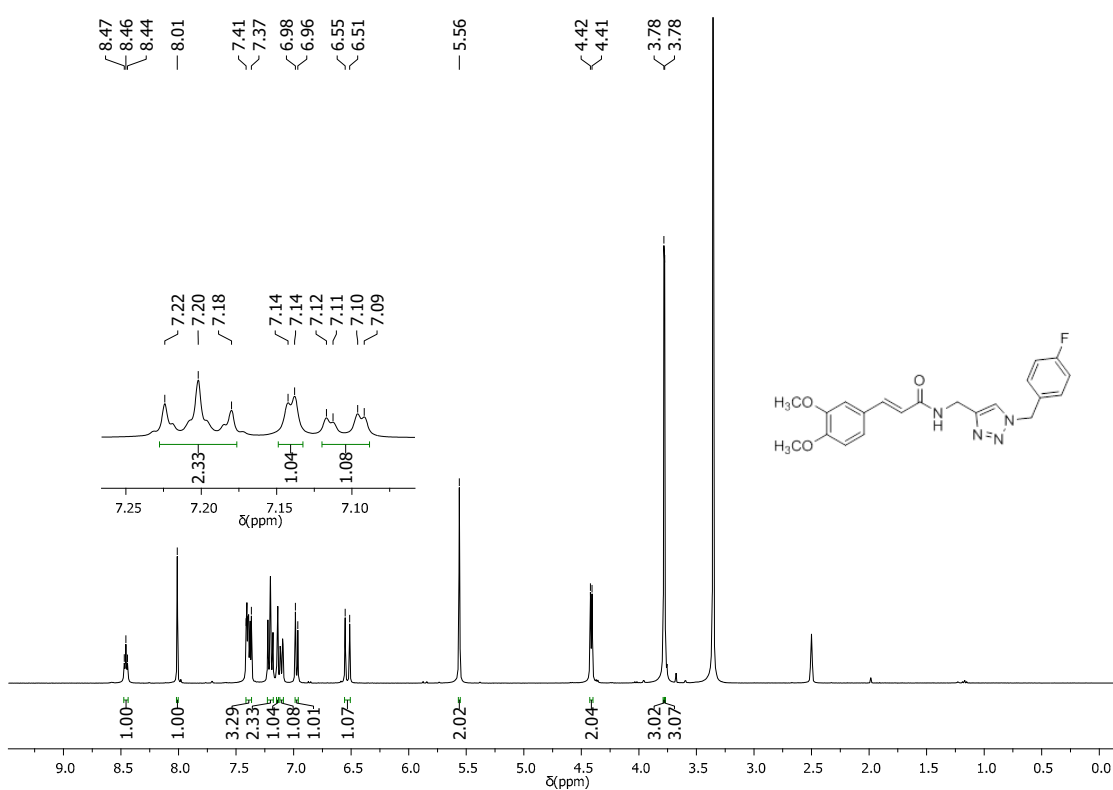

**Figure S54 - <sup>1</sup>H NMR spectrum (400 MHz, DMSO-*d*<sub>6</sub>) of 18.**

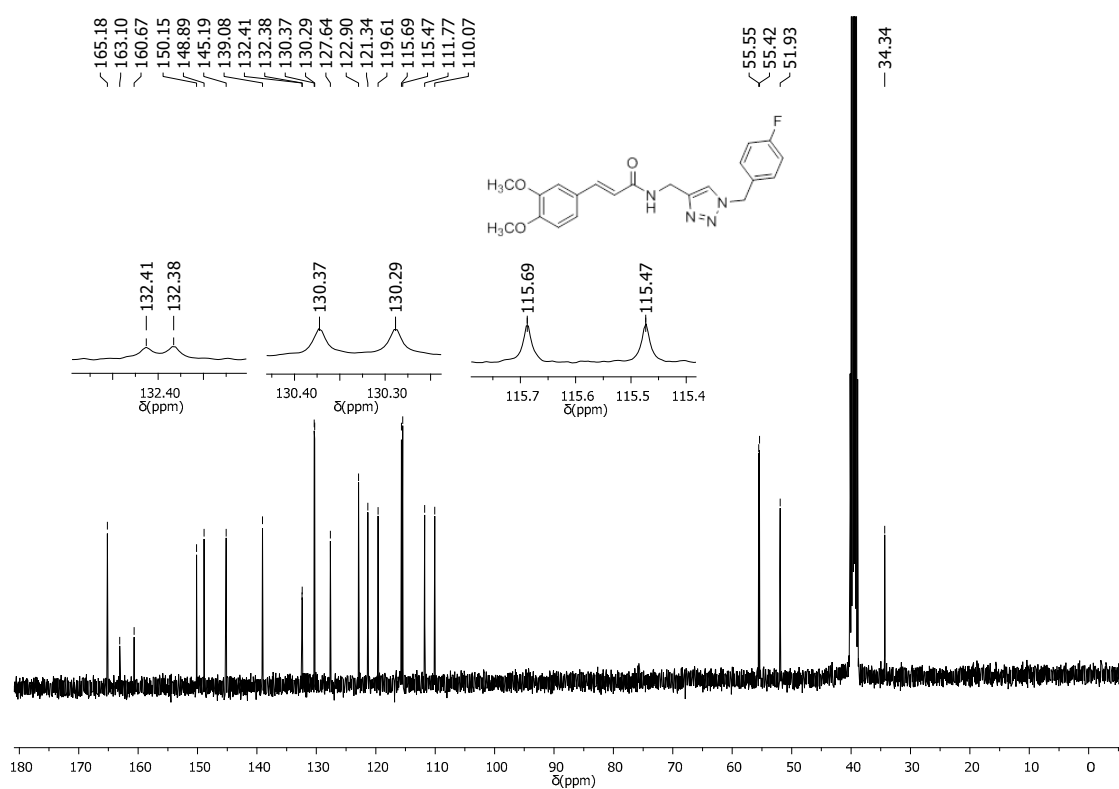

**Figure S55** - <sup>13</sup>C NMR spectrum (100 MHz, DMSO-*d*<sub>6</sub>) of **18**.

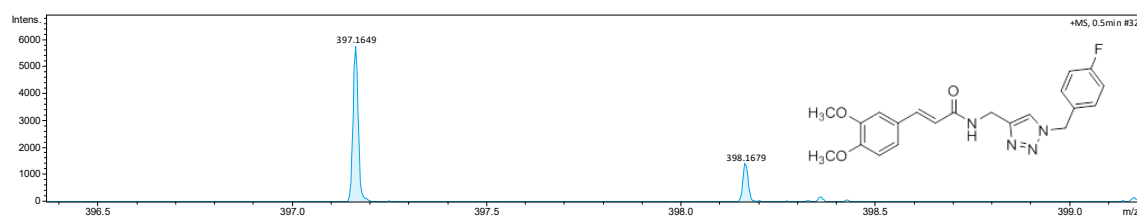

**Figure S56** - HRMS spectrum of **18**.

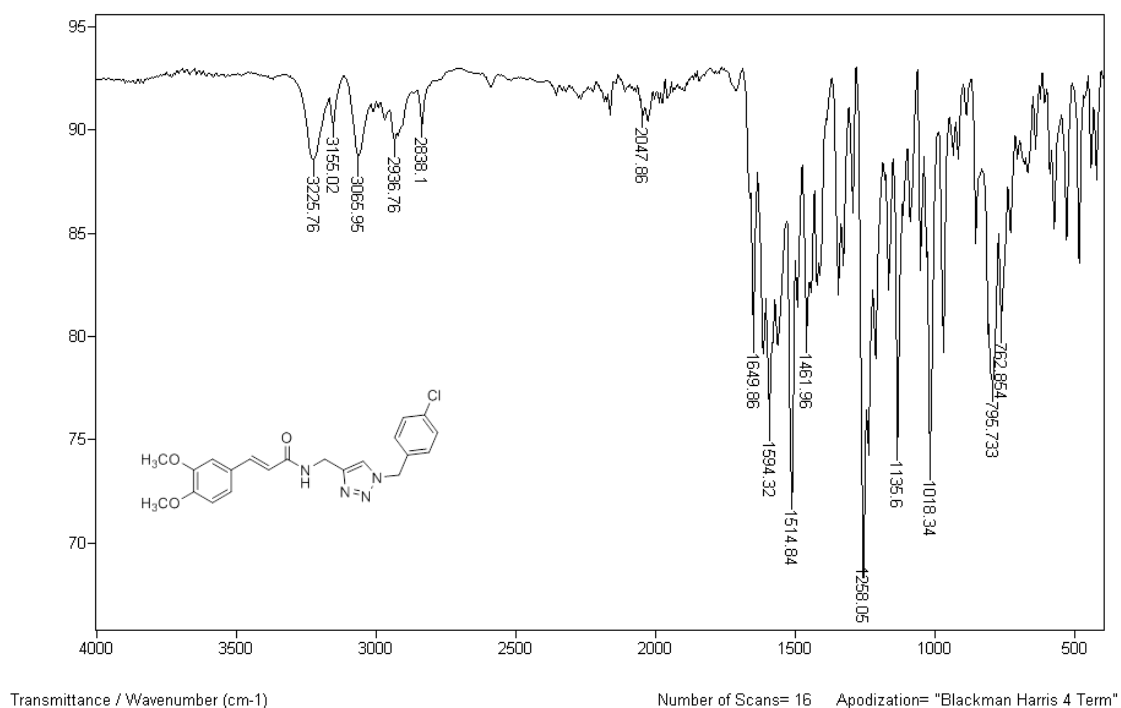

**Figure S57** - IR spectrum (ATR) of **19**.

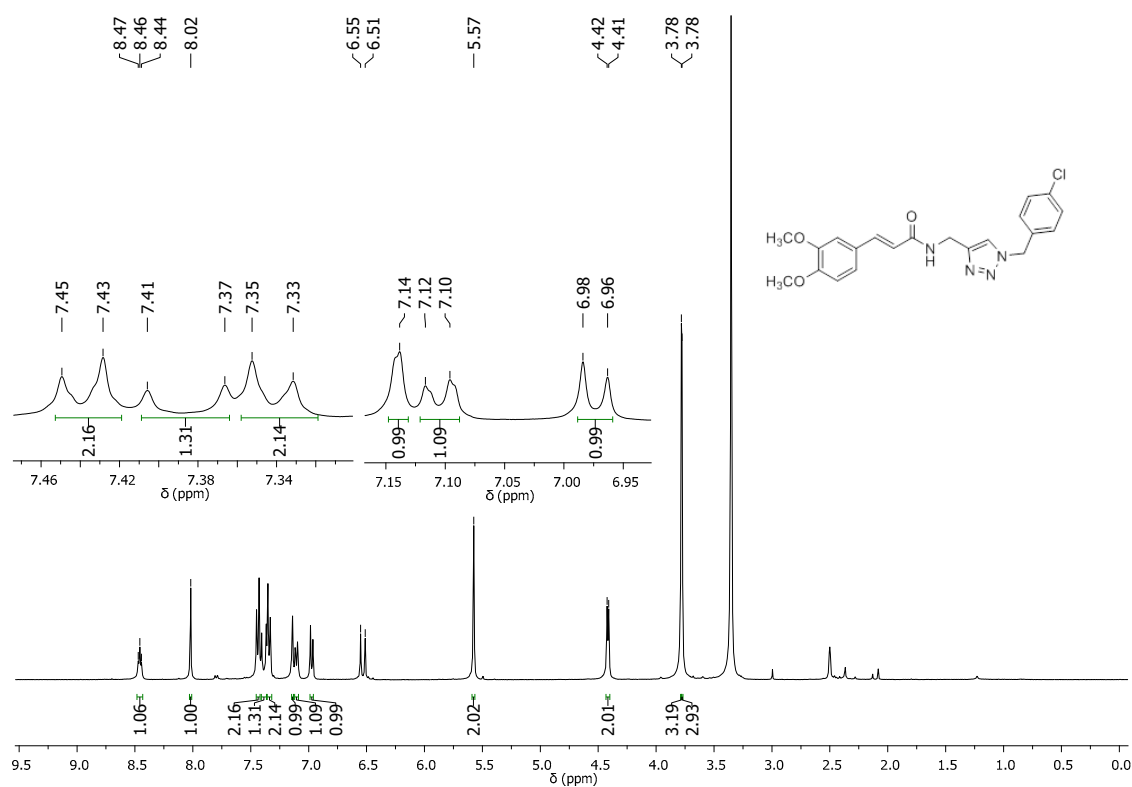

**Figure S58** - <sup>1</sup>H NMR spectrum (400 MHz, DMSO-*d*<sub>6</sub>) of **19**.

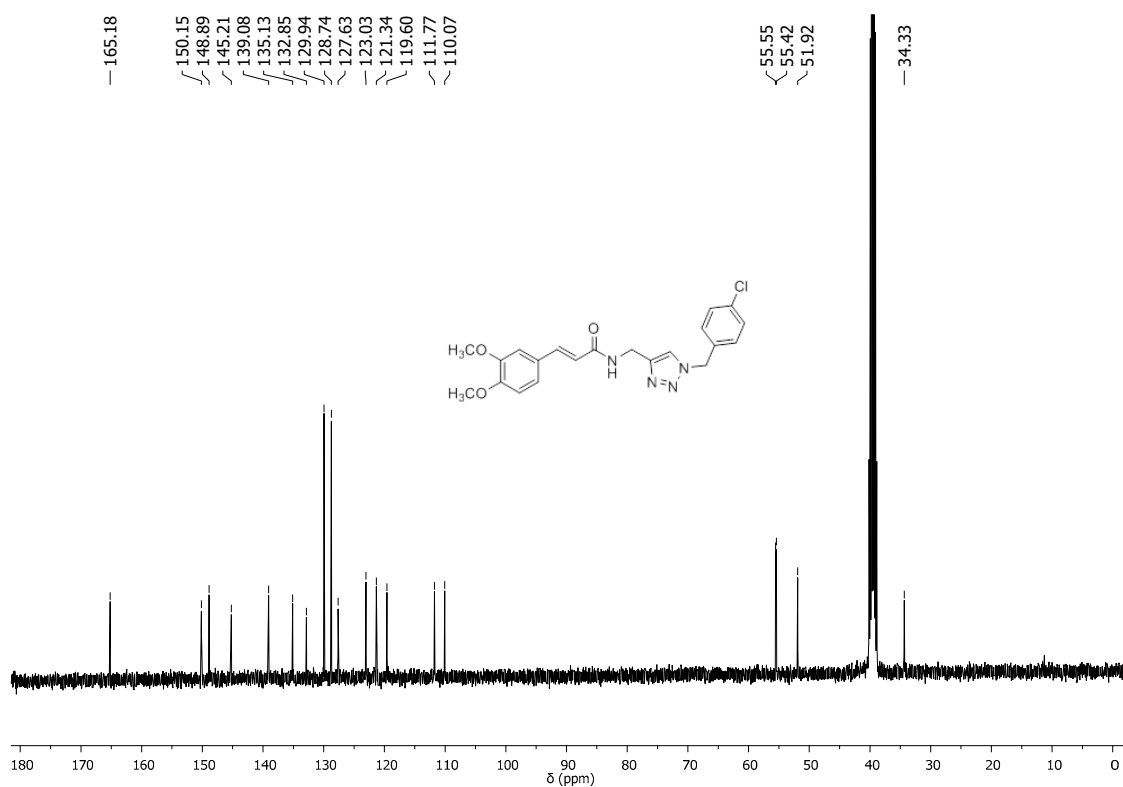

**Figure S59** - <sup>13</sup>C NMR spectrum (100 MHz, DMSO-*d*<sub>6</sub>) of **19**.

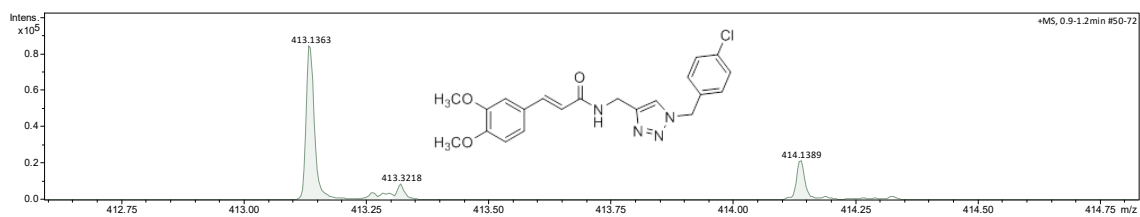

**Figure S60** - HRMS spectrum of **19**.



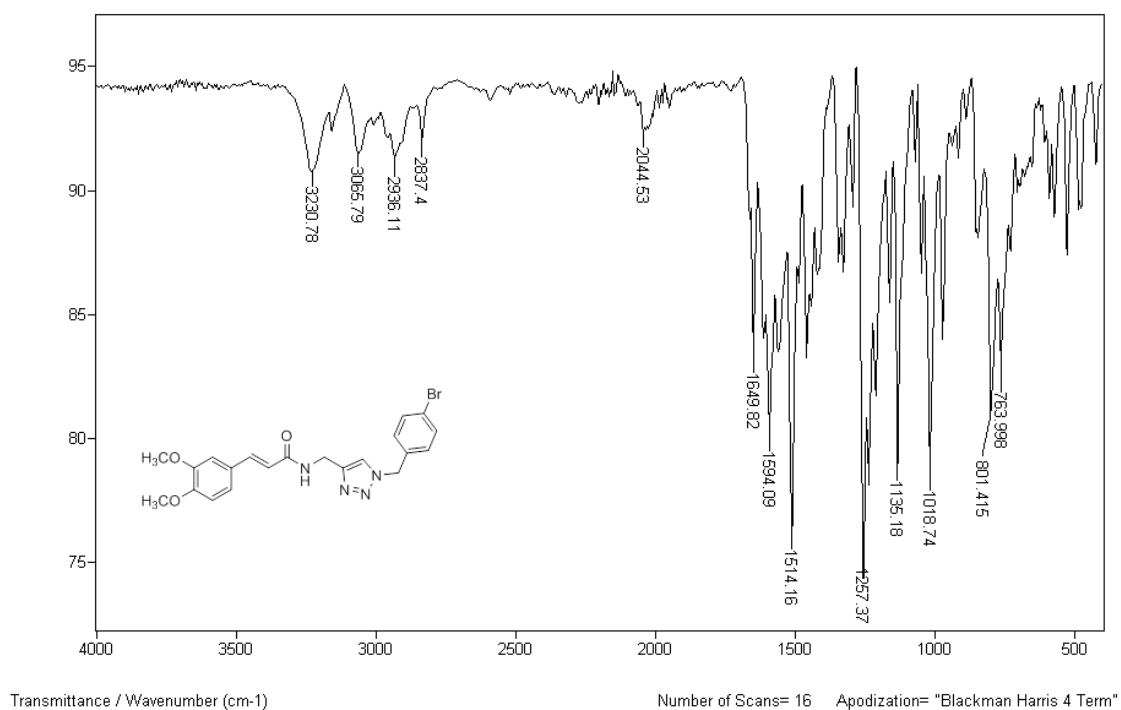

**Figure S61** - IR spectrum (ATR) of **20**.

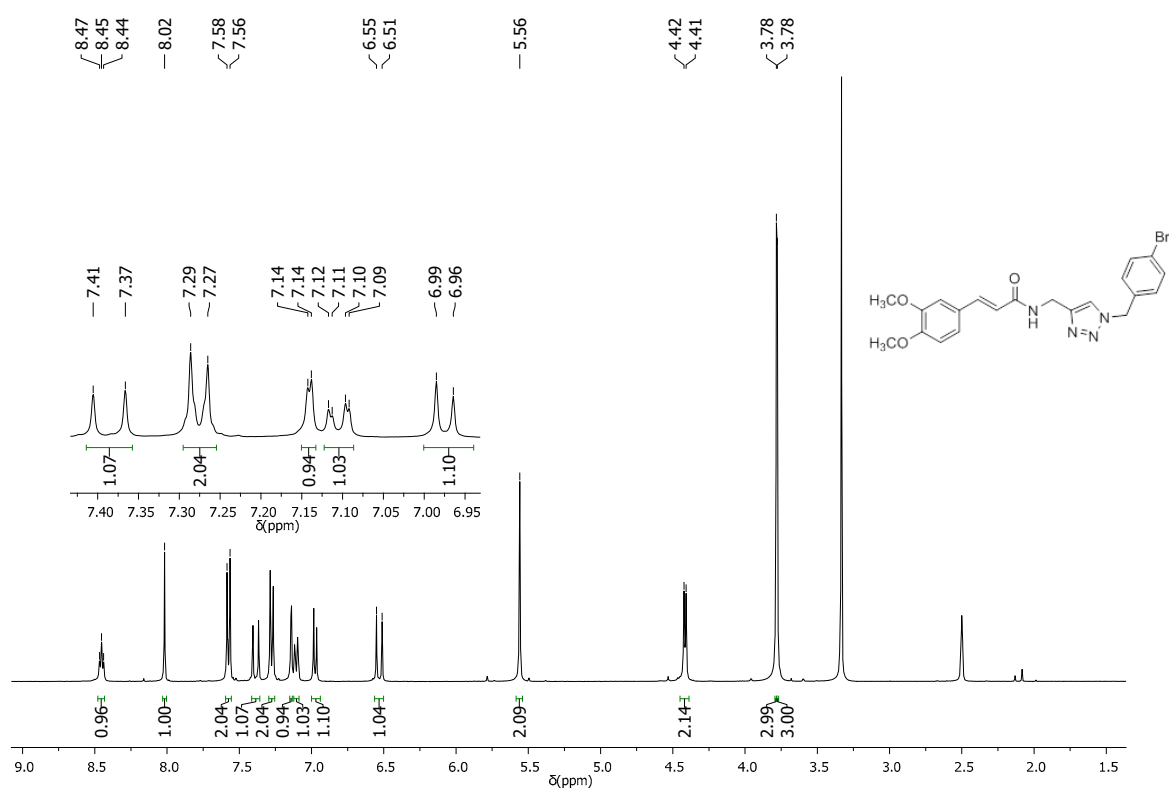

**Figure S62** - <sup>1</sup>H NMR spectrum (400 MHz, DMSO-*d*<sub>6</sub>) of **20**.

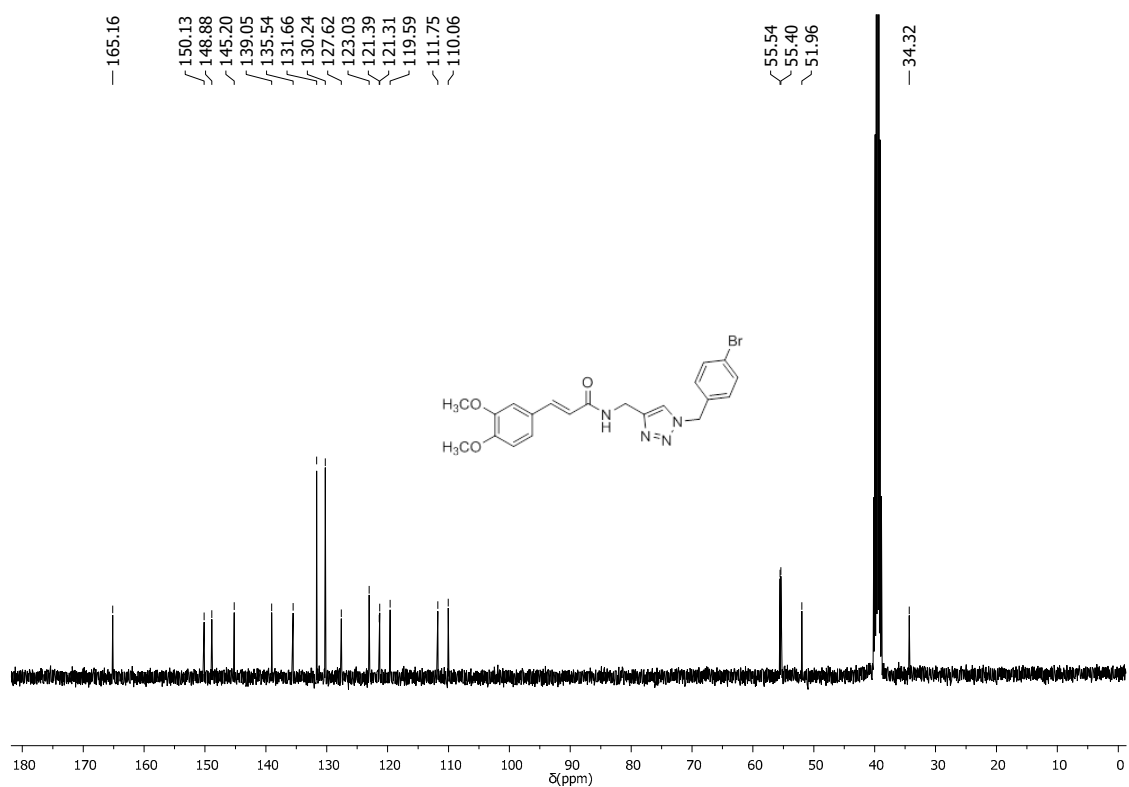

**Figure S63** - <sup>13</sup>C NMR spectrum (100 MHz, DMSO-*d*<sub>6</sub>) of **20**.

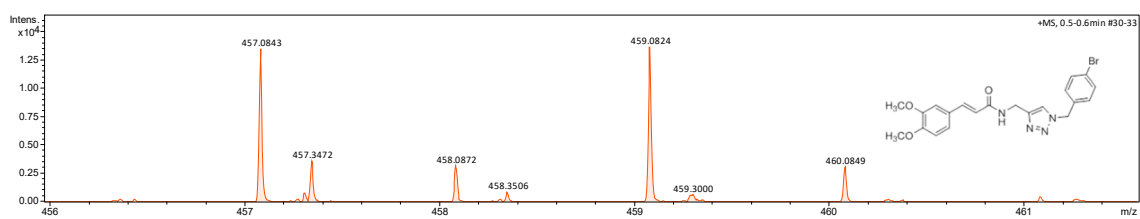

**Figure S64** - HRMS spectrum of **20**.

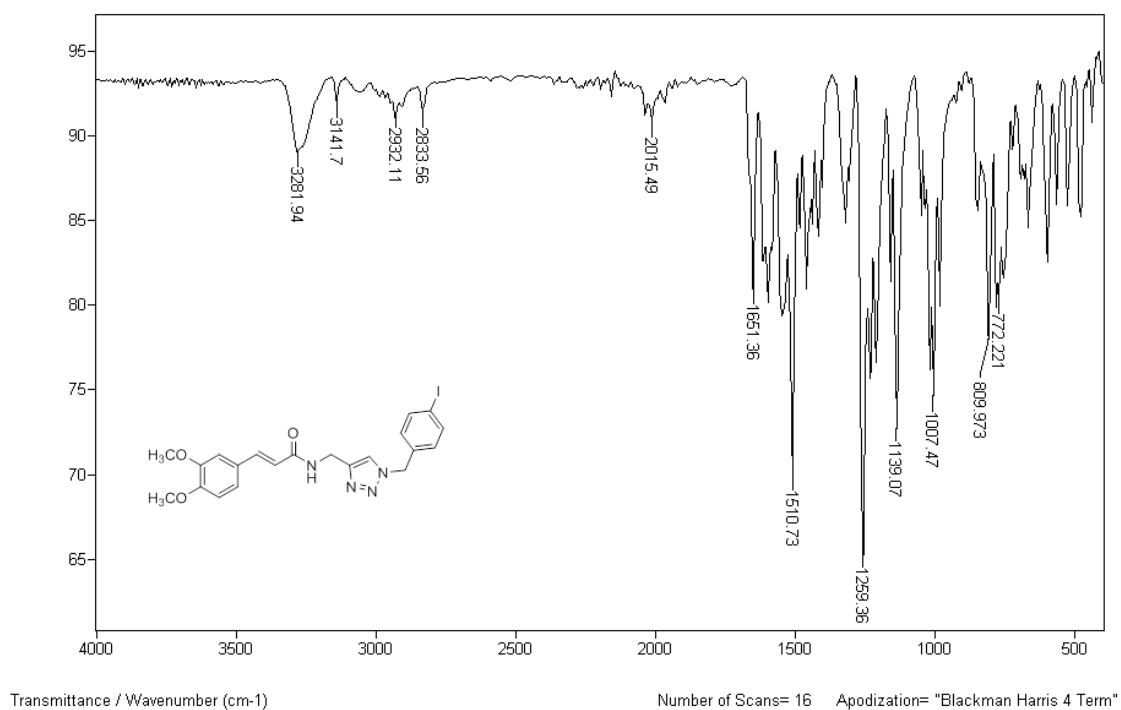

**Figure S65** - IR spectrum (ATR) of **21**.

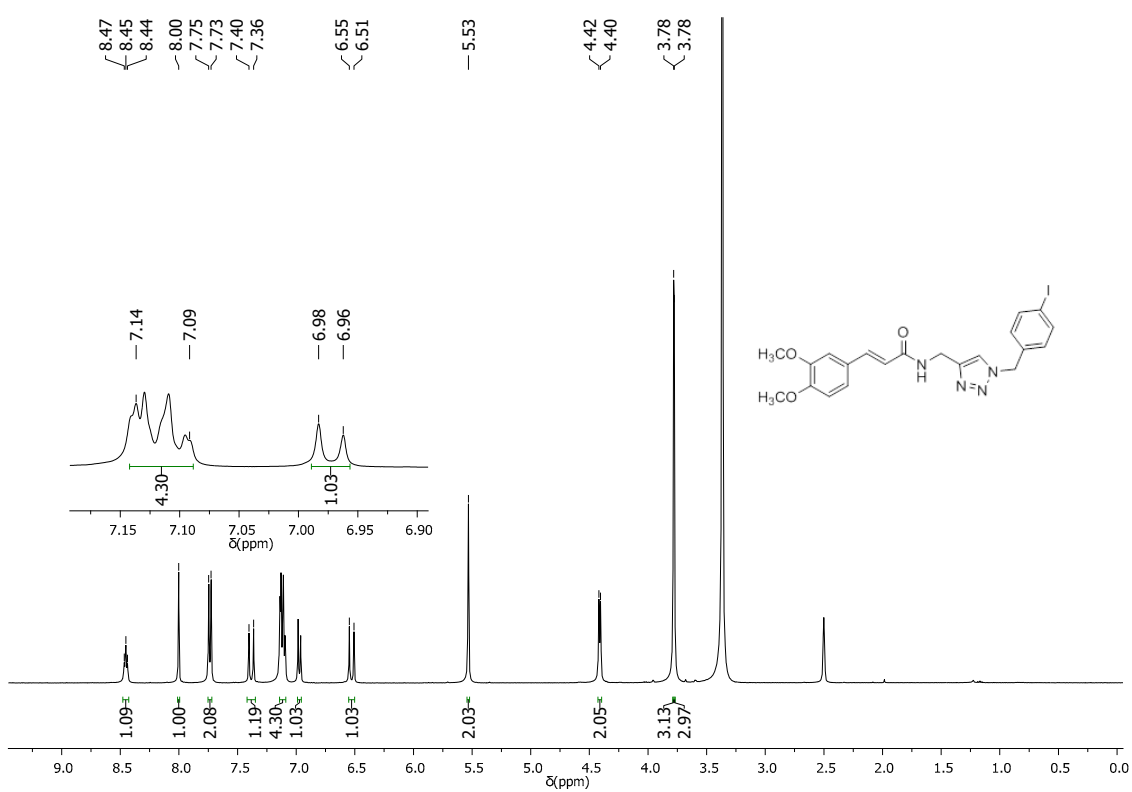

**Figure S66** - <sup>1</sup>H NMR spectrum (400 MHz, DMSO-*d*<sub>6</sub>) of **21**.

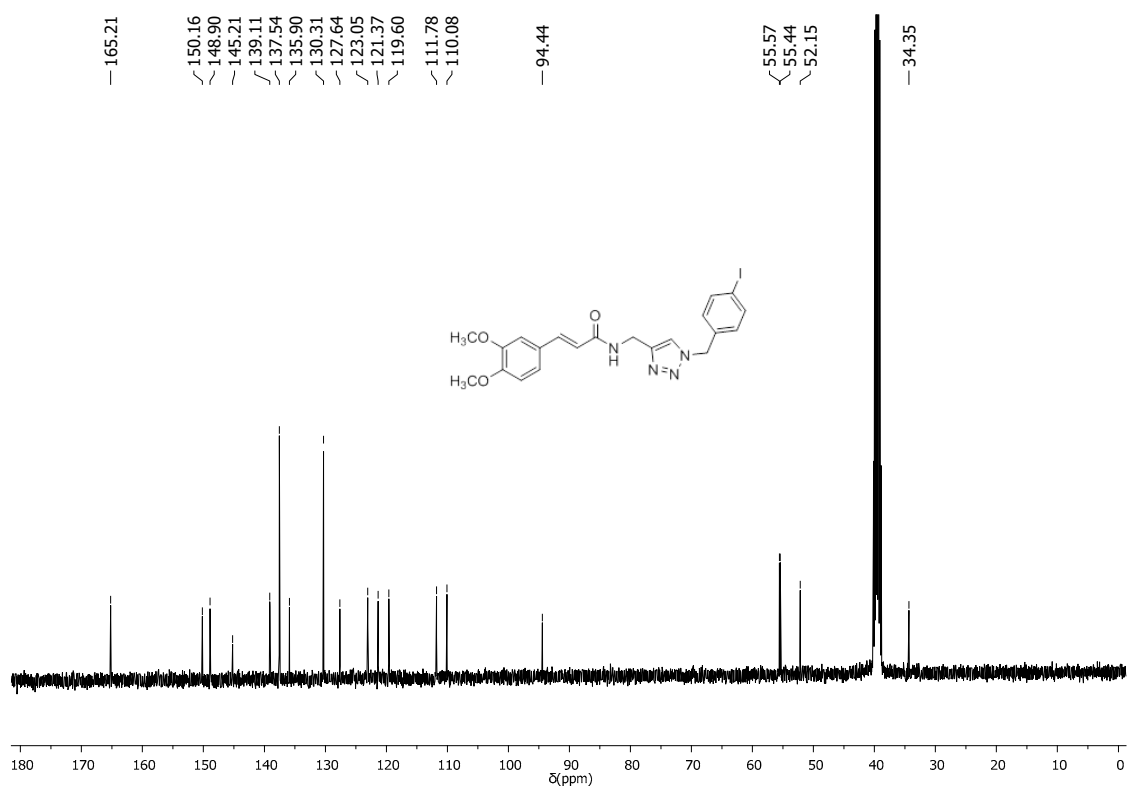

**Figure S67** - <sup>13</sup>C NMR spectrum (100 MHz, DMSO-*d*<sub>6</sub>) of **21**.

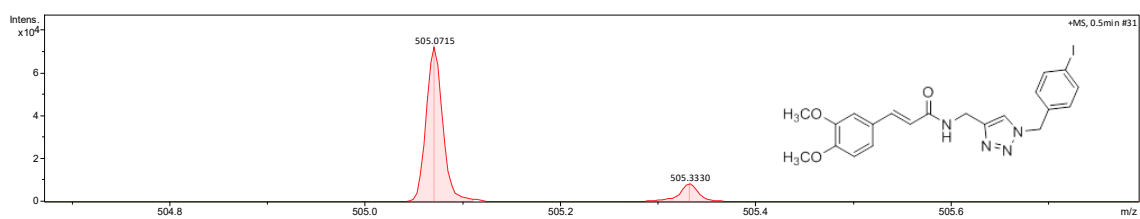

**Figure S68** - HRMS spectrum of **21**.



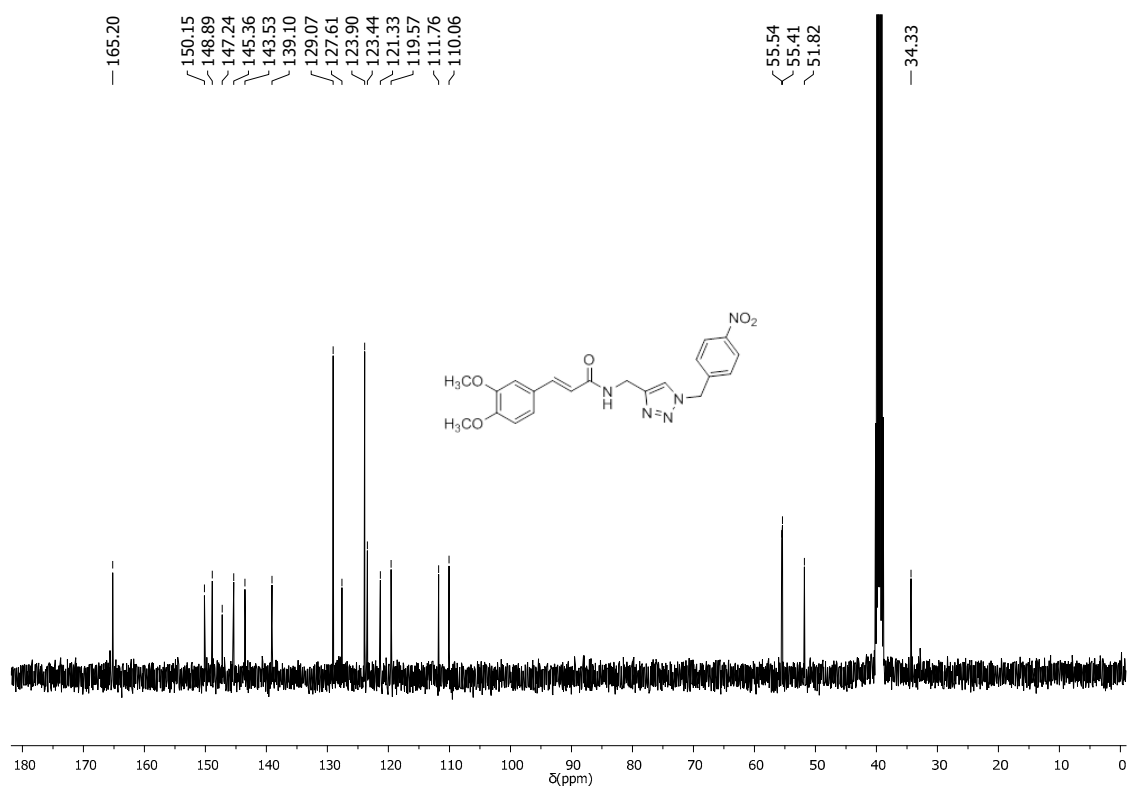

**Figure S71** - <sup>13</sup>C NMR spectrum (100 MHz, DMSO-*d*<sub>6</sub>) of **22**.

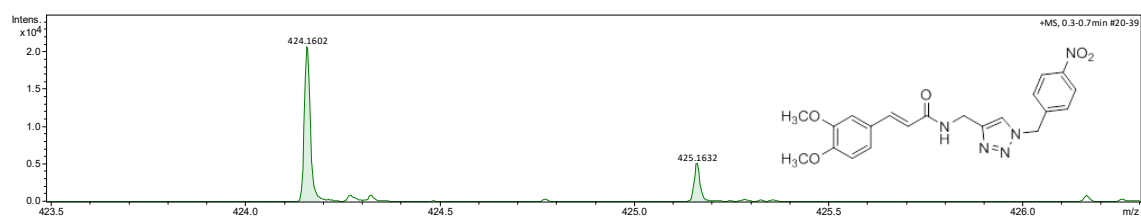

**Figure S72** - HRMS spectrum of **22**.

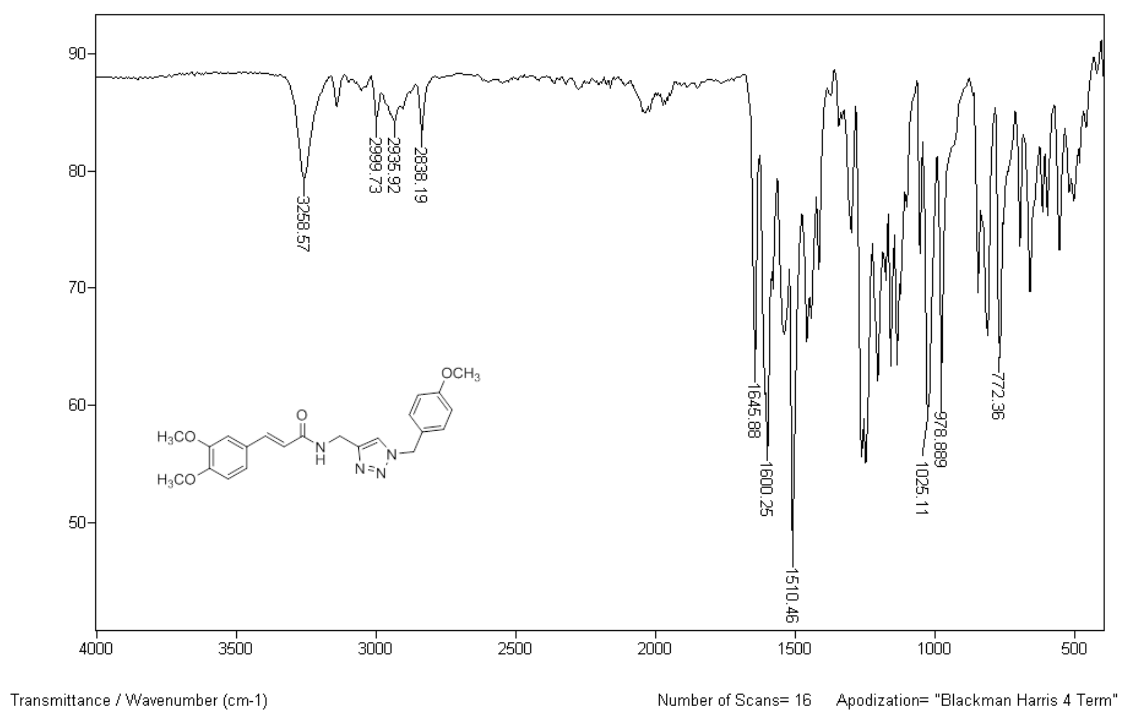

**Figure S73** - IR spectrum (ATR) of **23**.

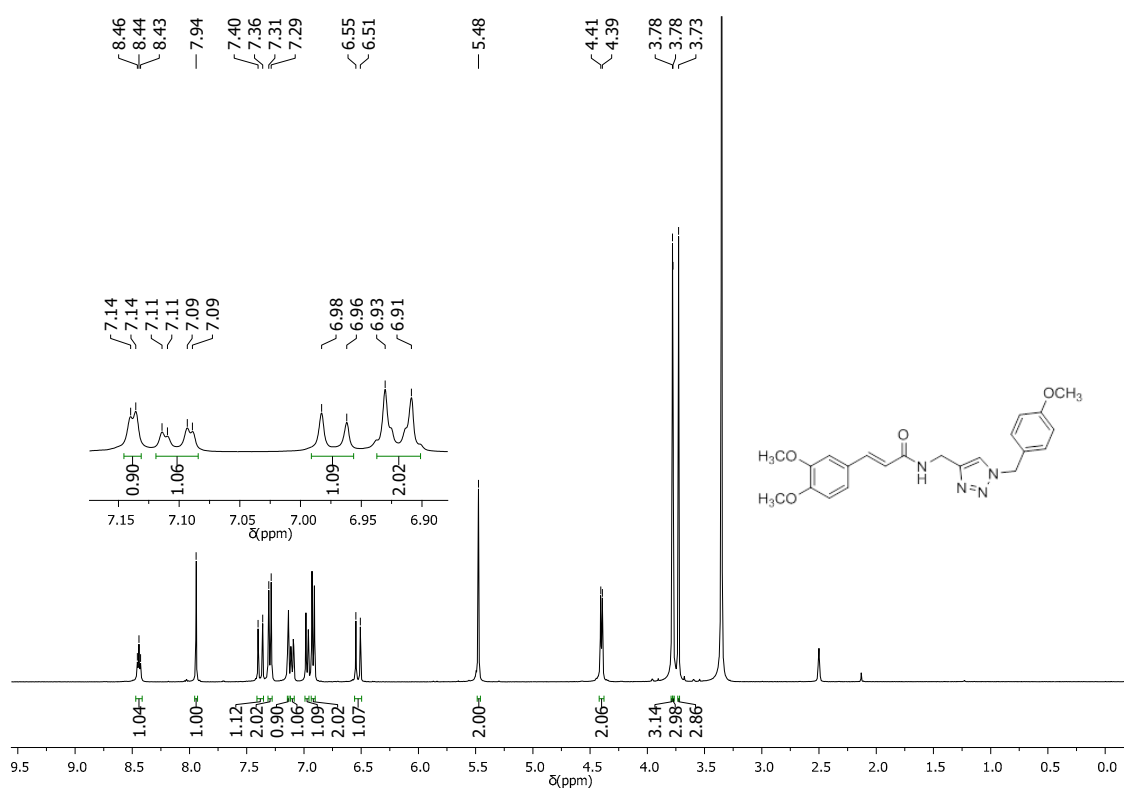

**Figure S74** - <sup>1</sup>H NMR spectrum (400 MHz, DMSO-*d*<sub>6</sub>) of **23**.

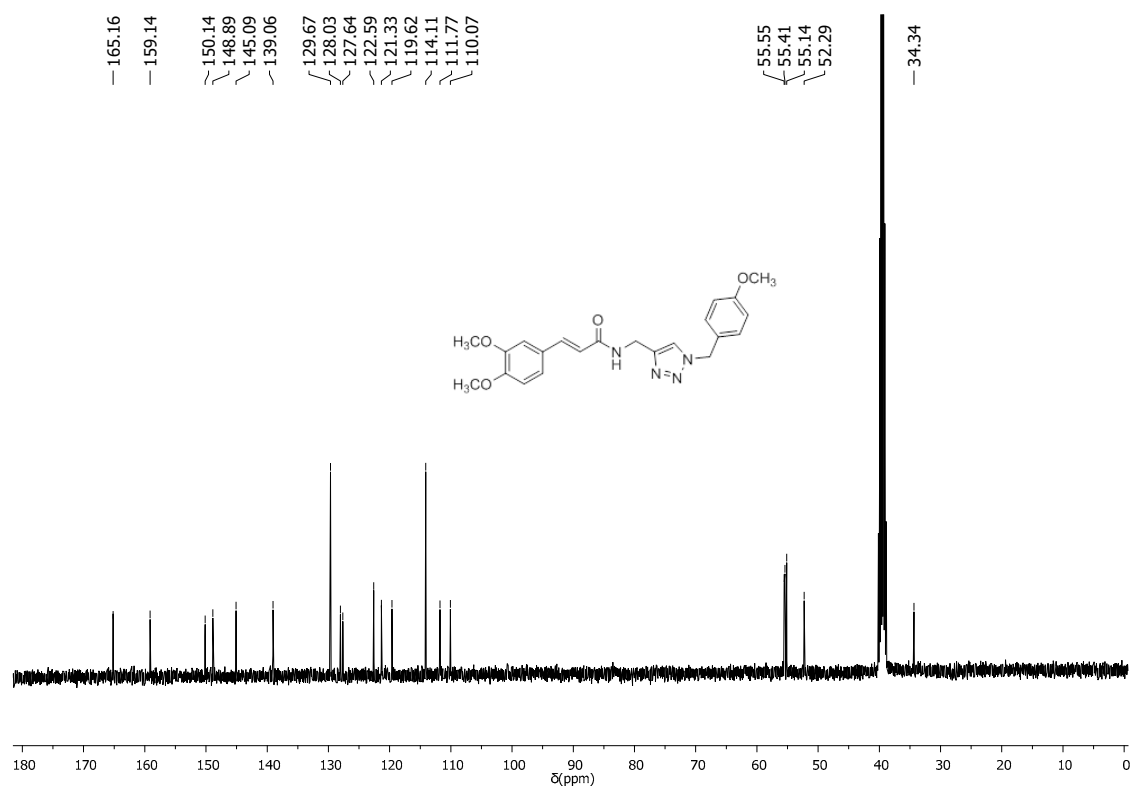

**Figure S75** - <sup>13</sup>C NMR spectrum (100 MHz, DMSO-*d*<sub>6</sub>) of **23**.

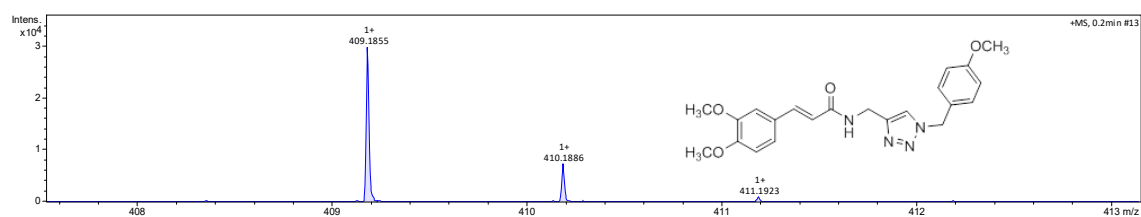

**Figure S76** - HRMS spectrum of **23**.





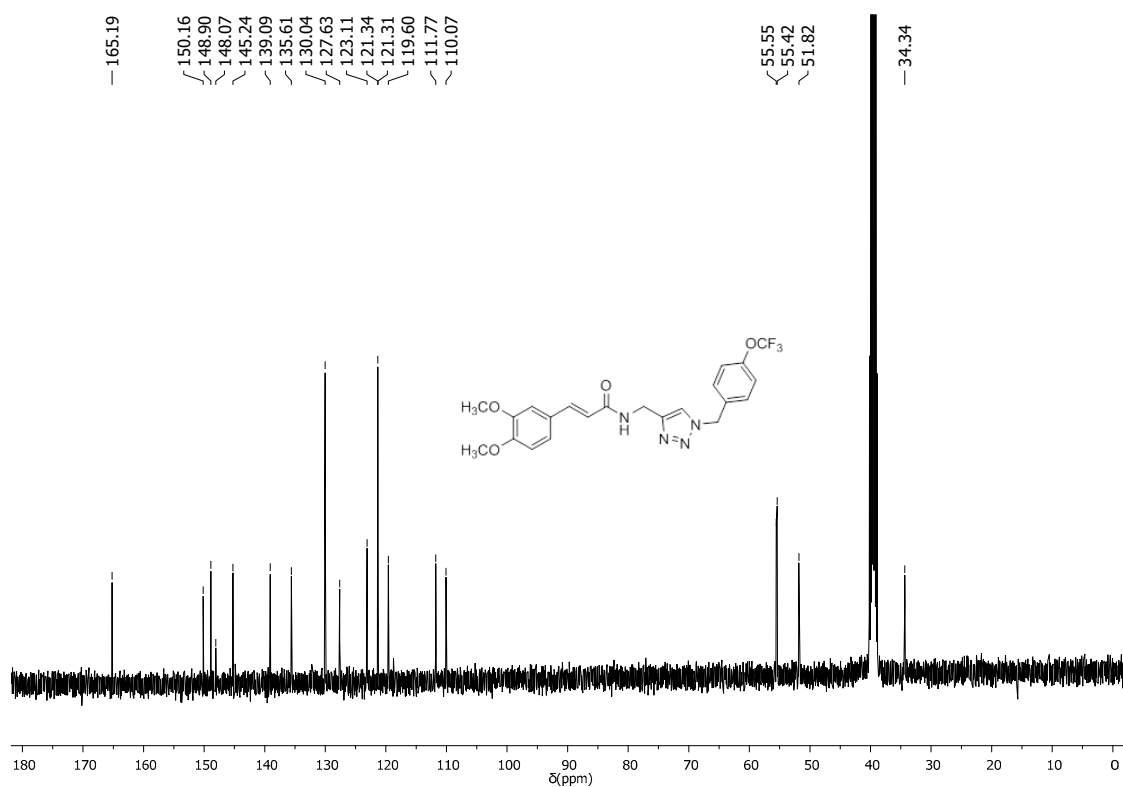

**Figure S79** - <sup>13</sup>C NMR spectrum (100 MHz, DMSO-*d*<sub>6</sub>) of **24**.

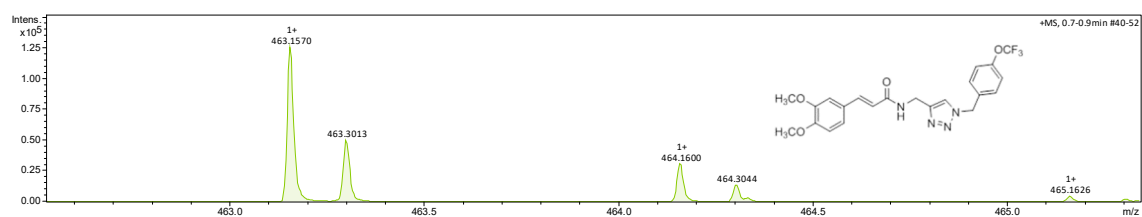

**Figure S80** - HRMS spectrum of **24**.



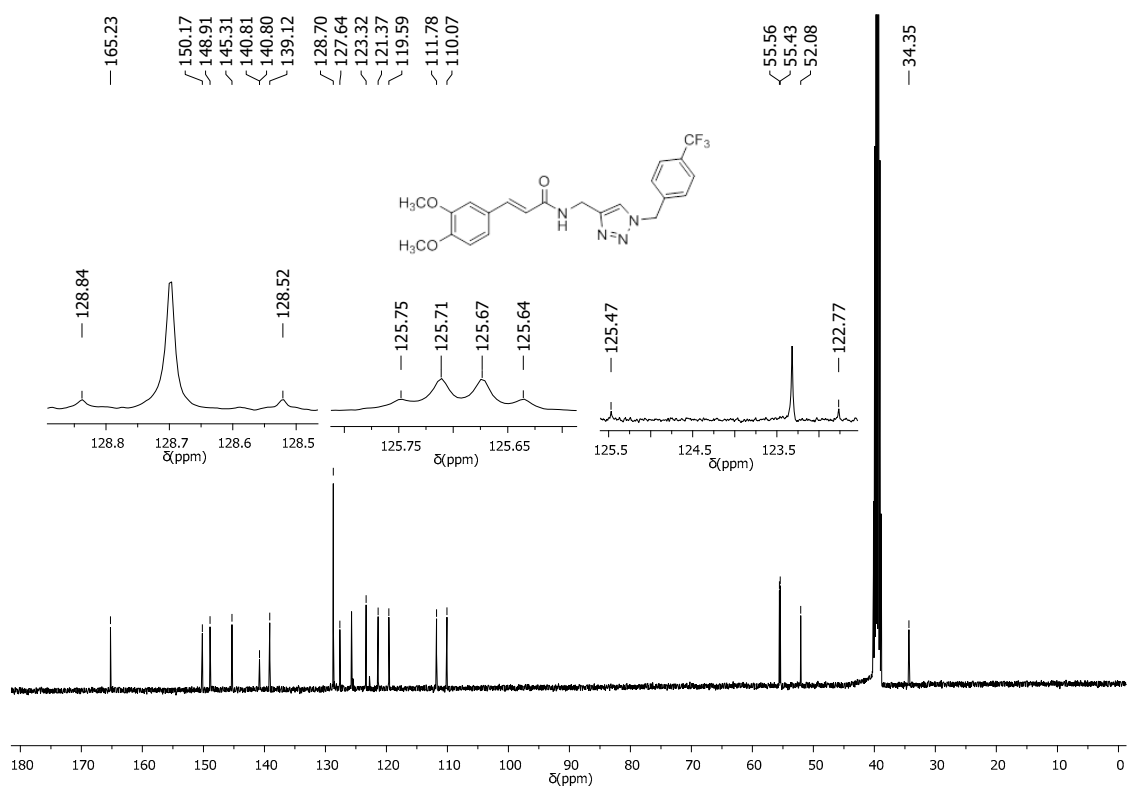

**Figure S83** - <sup>13</sup>C NMR spectrum (100 MHz, DMSO-*d*<sub>6</sub>) of **25**.

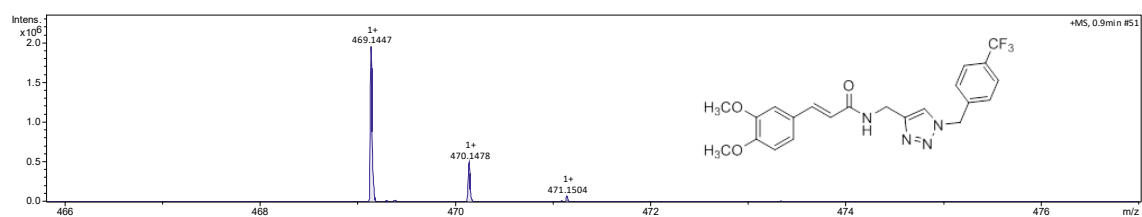

**Figure S84** - HRMS spectrum of **25**.



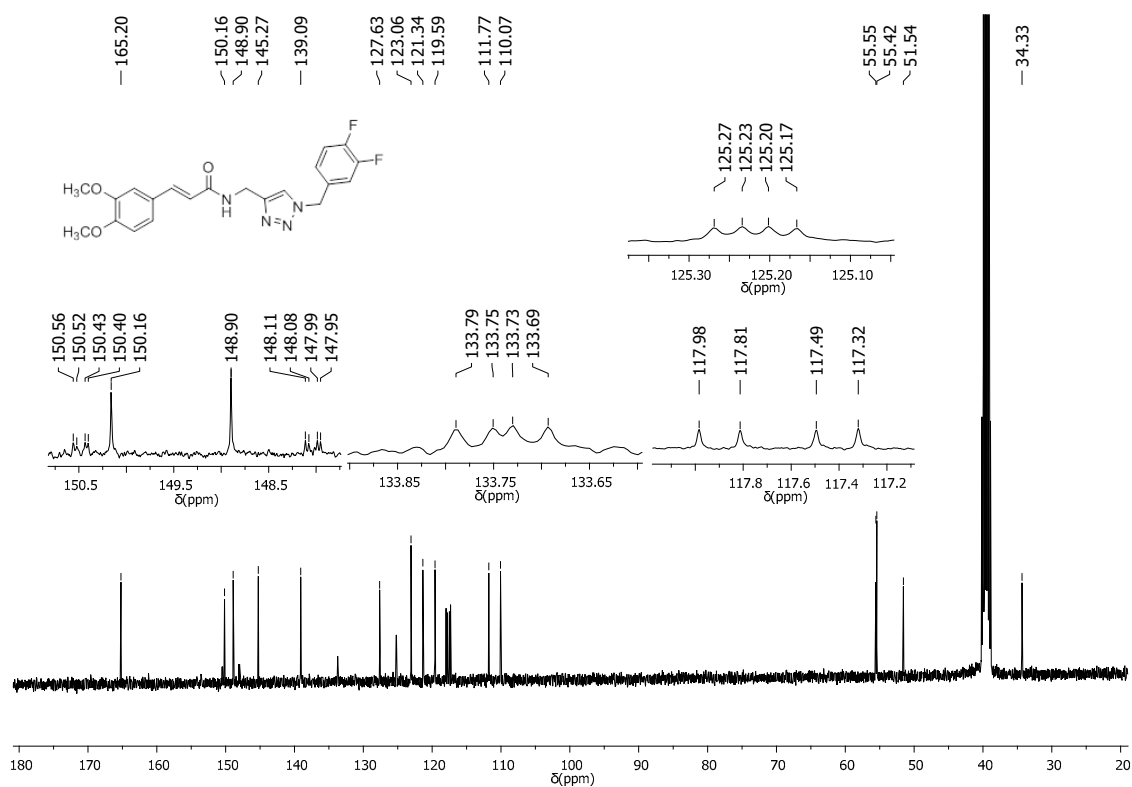

Figure S87 - <sup>13</sup>C NMR spectrum (100 MHz, DMSO-*d*<sub>6</sub>) of 26.

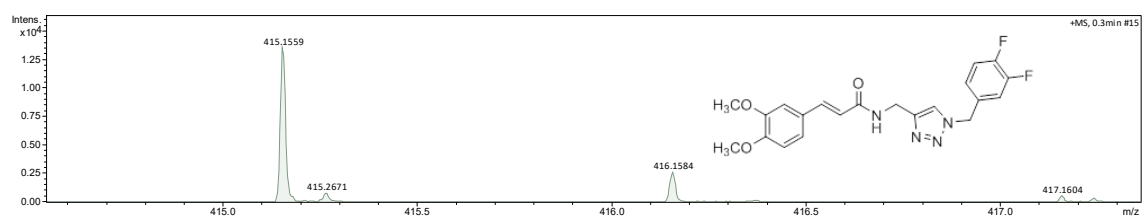

Figure S88 - HRMS spectrum of 26.

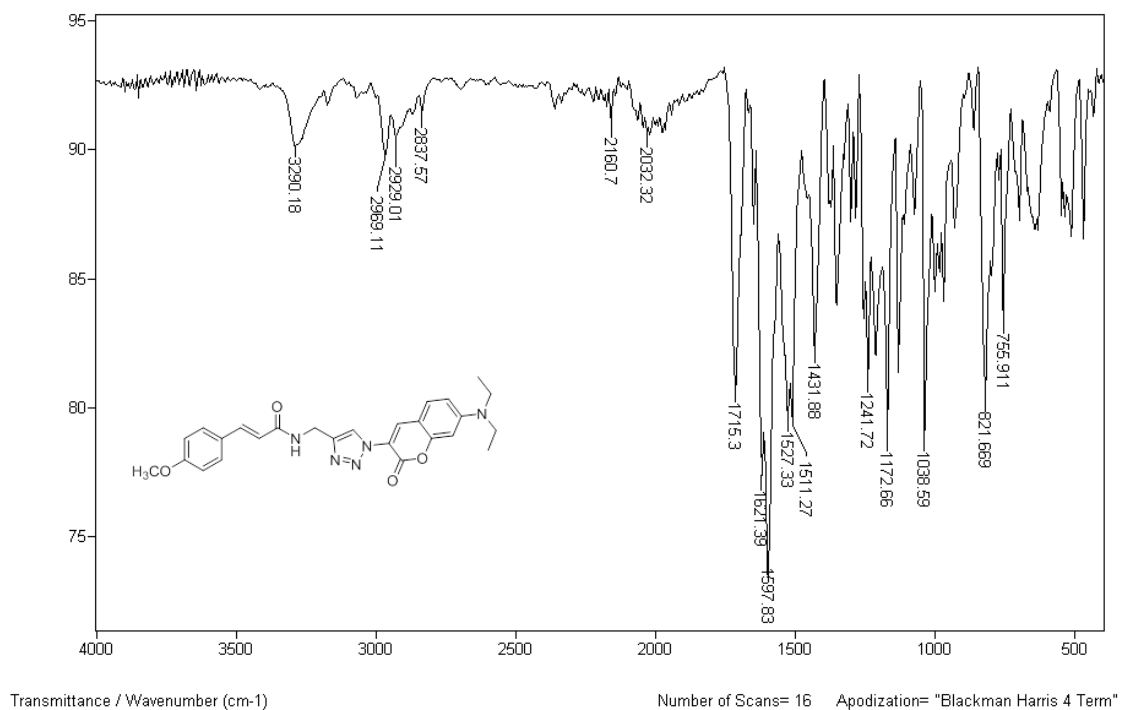

**Figure S89** - IR spectrum (ATR) of **27**.

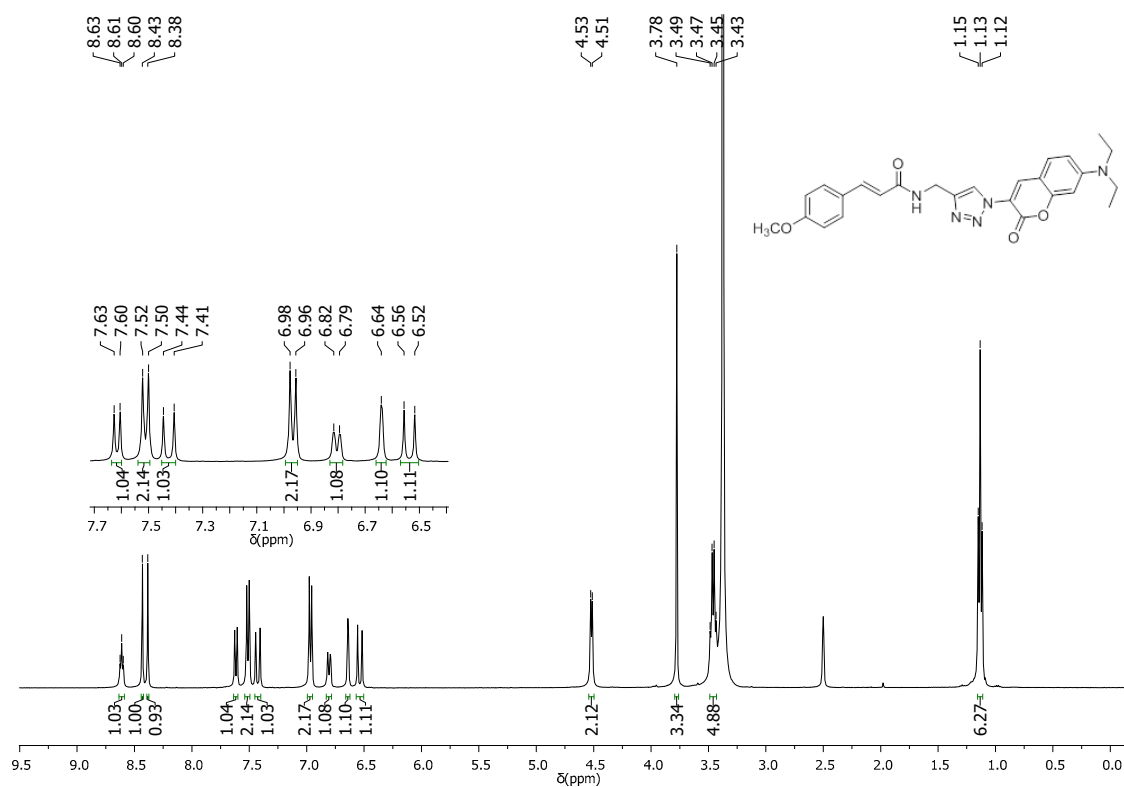

**Figure S90** - <sup>1</sup>H NMR spectrum (400 MHz, DMSO-*d*<sub>6</sub>) of **27**.

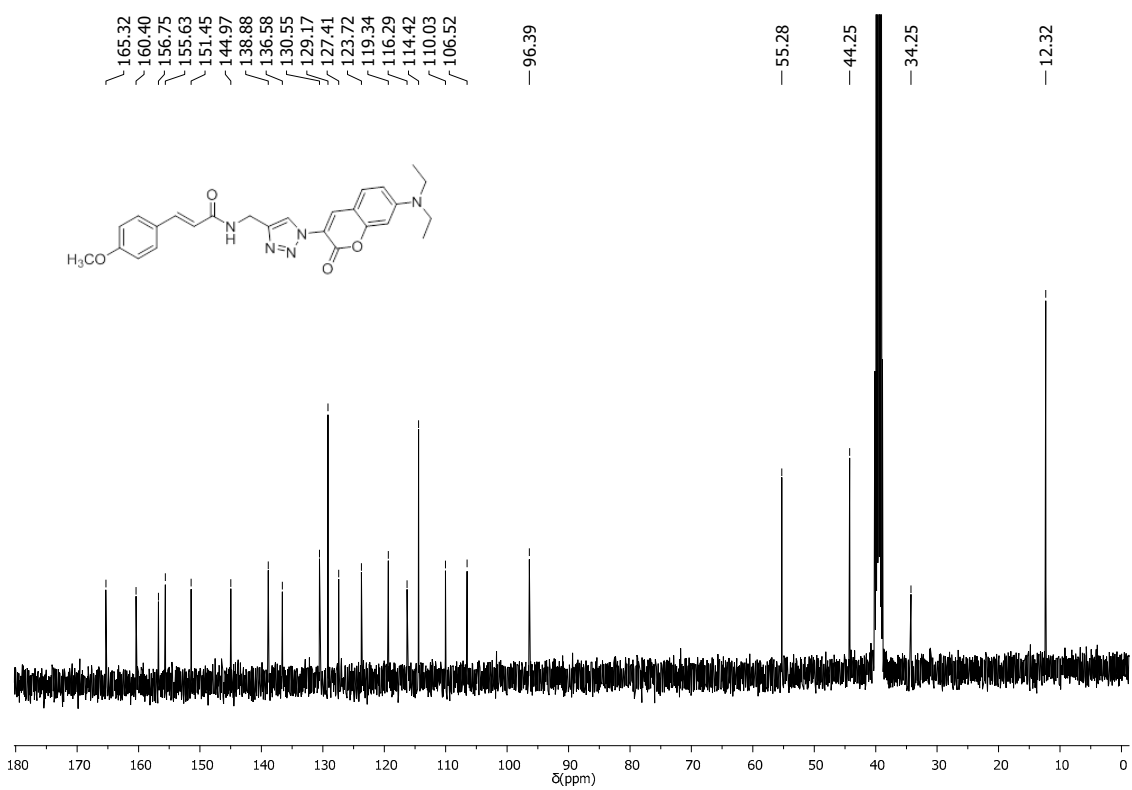

**Figure S91** - <sup>13</sup>C NMR spectrum (100 MHz, DMSO-*d*<sub>6</sub>) of 27.

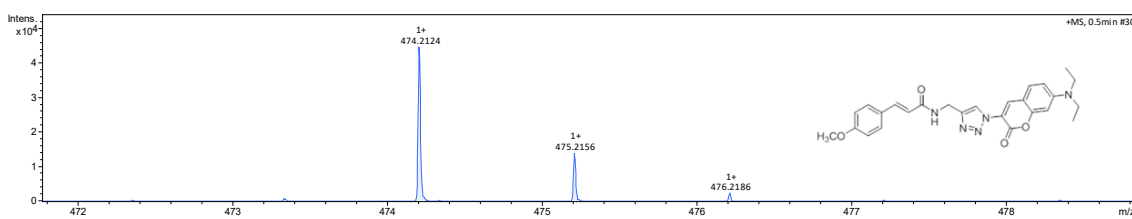

**Figure S92** - HRMS spectrum of 27.





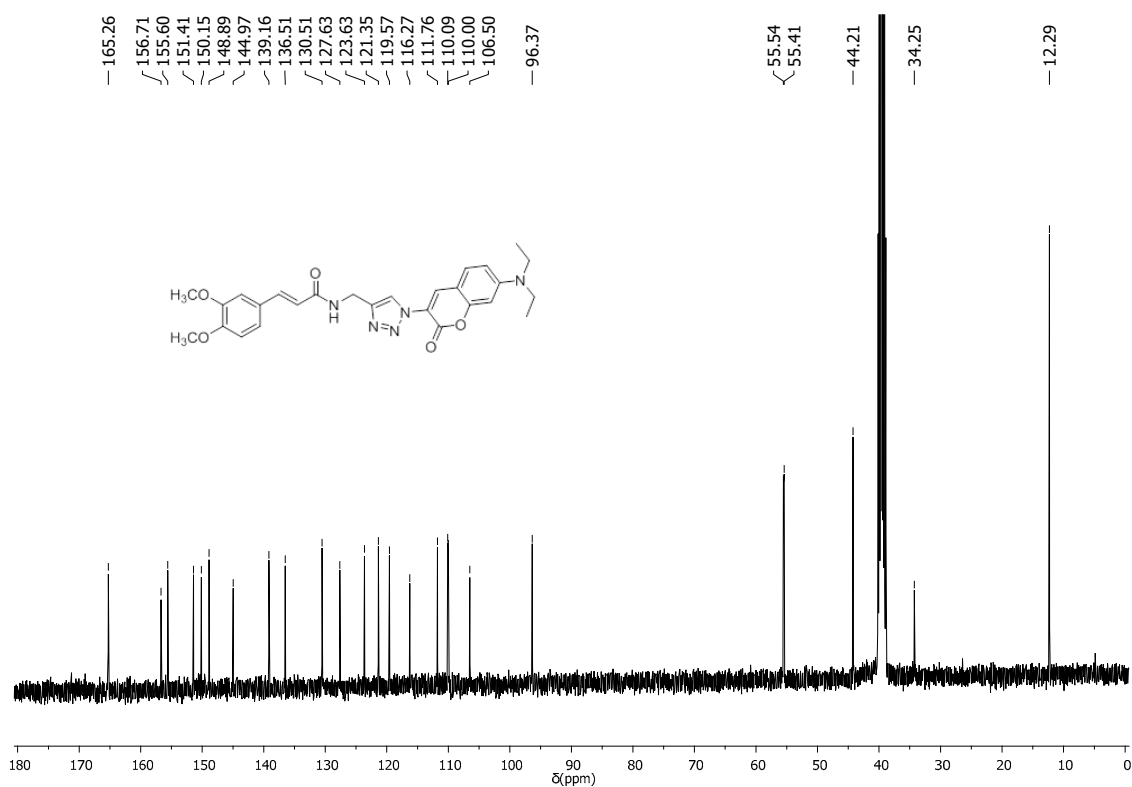

**Figure S95** - <sup>13</sup>C NMR spectrum (100 MHz, DMSO-*d*<sub>6</sub>) of **28**.

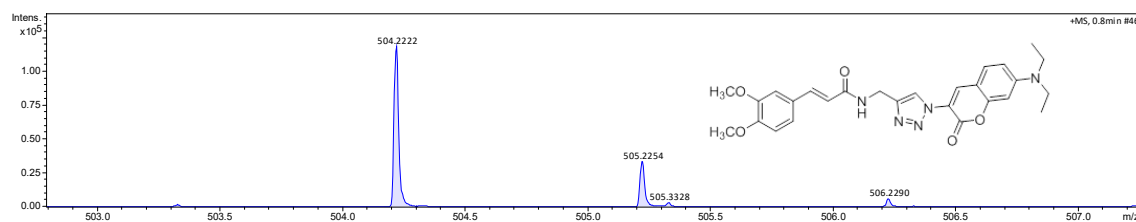

**Figure S96** - HRMS spectrum of **28**.
